1 **Evaluation of Natural and Botanical Medicines for Activity against Growing and**  
2 **Non-growing Forms of *B. burgdorferi***

3

4 Jie Feng<sup>1</sup>, Jacob Leone<sup>2</sup>, Sunjya Schweig<sup>3\*</sup>, Ying Zhang<sup>1\*</sup>

5

6 <sup>1</sup> Department of Molecular Microbiology and Immunology, Bloomberg School of Public Health,  
7 Johns Hopkins University, Baltimore, MD 21205, USA

8 <sup>2</sup> FOCUS Health Group, Naturopathic, Novato, CA 94949, USA

9 <sup>3</sup> California Center for Functional Medicine, Kensington, CA 94707, USA

10

11

12

13

14

15

16 \*Corresponding authors:

17 Ying Zhang, MD, PhD

18 Department of Molecular Microbiology and Immunology

19 Bloomberg School of Public Health

20 Johns Hopkins University

21 Baltimore, MD 21205, USA

22 Email: [yzhang@jhsph.edu](mailto:yzhang@jhsph.edu)

23

24 Sunjya Schweig, MD

25 California Center for Functional Medicine

26 Kensington, CA 94707, USA

27 Email: [sunjya@ccfmed.com](mailto:sunjya@ccfmed.com)

28

29 **Keywords:** *Borrelia burgdorferi*, persists, botanical medicines, herbs, natural medicines

30

## 31 Abstract

32 Lyme disease is the most common vector-borne disease in the US. Although the current  
33 recommended Lyme antibiotic treatment can cure the majority of Lyme disease patients, about 10-  
34 20% patients continue to suffer from persisting symptoms. There have been various anecdotal  
35 reports on the use of herbal extracts for treating patients with persisting symptoms with varying  
36 degree of improvements. However, it is unclear whether the effect of the herb products is due to  
37 their direct antimicrobial activity or their effect on host immune system. In the present study, we  
38 investigated the antimicrobial effects of 12 commonly used botanical medicines and 3 other natural  
39 antimicrobial agents for potential anti-*Borrelia burgdorferi* activity in vitro. Primary criteria for  
40 selecting compounds for the present study included agents that had shown significant anti-borrelial  
41 effects in previous studies, have favorable safety profiles, and can be absorbed systemically.  
42 Among them, 9 natural product extracts at 1% were found to have good activity against the  
43 stationary phase *B. burgdorferi* culture compared to the control antibiotics doxycycline and  
44 cefuroxime. These active herbs include *Cryptolepis sanguinolenta*, *Juglans nigra* (Black walnut),  
45 *Polygonum cuspidatum* (Japanese knotweed), *Artemisia annua* (Sweet wormwood), *Uncaria*  
46 *tomentosa* (Cat's claw), *Cistus incanus*, and *Scutellaria baicalensis* (Chinese skullcap). In contrast,  
47 *Stevia rebaudiana*, *Andrographis paniculata*, Grapefruit seed extract, colloidal silver, monolaurin,  
48 and antimicrobial peptide LL37 had little or no activity against stationary phase *B. burgdorferi*. The  
49 minimum inhibitory concentration (MIC) values of *Artemisia annua*, *Juglans nigra*, and *Uncaria*  
50 *tomentosa* were quite high for growing *B. burgdorferi*, despite their strong activity against the non-  
51 growing stationary phase *B. burgdorferi* cells. On the other hand, the top two active herbs,  
52 *Cryptolepis sanguinolenta* and *Polygonum cuspidatum*, showed strong activity against both  
53 growing *B. burgdorferi* (MIC=0.03%-0.06% and 0.25%-0.5% respectively) and non-growing  
54 stationary phase *B. burgdorferi*. In subculture studies, only 1% *Cryptolepis sanguinolenta* extract  
55 caused complete eradication, while current Lyme antibiotics doxycycline and cefuroxime and other  
56 active herbs including *Polygonum cuspidatum*, *Artemisia annua*, *Juglans nigra* and *Uncaria*  
57 *tomentosa* could not eradicate *B. burgdorferi* stationary phase cells as many spirochetes were  
58 visible after 21-day subculture. Further studies are needed to identify the active ingredients of the  
59 effective herbs and evaluate their combinations for more effective eradication of *B. burgdorferi* in  
60 vitro and in vivo. The implications of these findings for more effective treatment of persistent Lyme  
61 disease are discussed.

62

## 63 Introduction

64 Lyme disease, caused by *Borrelia burgdorferi*, and multiple closely related *Borrelia* species, is the  
65 most common vector-borne human disease in the Northern Hemisphere (1, 2). About 300,000 new  
66 cases are reported in the United States annually (3, 4). Tick-borne infections are on the rise in the  
67 USA and Europe due to a host of different factors including climate change (5-7), and disruption of  
68 predator density in suburban areas (8). Recent studies on tick prevalence and pathogen load have  
69 identified new geographical areas where vector ticks are present (9), as well as novel tick-borne  
70 pathogens present in areas where they had not previously been identified (such as *B. miyamotoi* in  
71 Northern California)(10).

72

73 Lyme disease can affect many different body systems and organs (11). While many patients recover  
74 fully with early antibiotic therapy, at least 10-20% of patients experience persistent symptoms

75 following the conventionally recommended course of 2-4 weeks of antibiotics (12-14), and a recent  
76 retrospective analysis documented 63% of patients experienced persistent symptoms after receiving  
77 antibiotic treatment for Lyme disease (15). Patients who experience persistent symptoms have  
78 significant and ongoing disability (16, 17) and increased health care costs and utilization (15). *B.*  
79 *burgdorferi* can evade the immune system response (18, 19) and multiple studies have shown that  
80 the bacteria is capable of persisting in diverse tissues across a variety of animal models despite  
81 aggressive and prolonged antibiotic therapy (20-23).

82

83 In addition to the mammalian studies noted above, *B. burgdorferi* persistence following  
84 antibiotic treatment has been demonstrated in human studies and case reports (24-27). Persistent  
85 Lyme borreliosis symptoms significantly affect quality of life (28, 29), therefore some physicians  
86 treat these patients with extended courses of antibiotics. However, this approach is controversial  
87 with one medical society guideline (30) advocating against retreating patients with persistent (>  
88 6 months) symptoms and another medical society guideline (31) recommends individualized  
89 risk-benefit assessments and potential retreatment or longer duration treatment of patients with  
90 persistent symptoms. While antibiotic retreatment has been associated with improved clinical  
91 outcomes (31, 32) it is of vital importance that novel safe and effective treatments be identified  
92 for clinical use. Furthermore, traditional antibiotic therapy appears to be more effective against  
93 the actively dividing spirochete form, and it has been shown that *B. burgdorferi* can change  
94 morphology and form biofilm-like microcolonies consisting of stationary phase persister bacteria  
95 (33-35). Traditional antibiotics have poor activity against the atypical persister forms (round  
96 bodies, microcolonies, and biofilm) and we have previously worked to identify novel drugs and  
97 drug combinations that are effective (33, 35, 36). While Daptomycin and Dapsone have been  
98 identified as having significant effects against borrelia persister cells in vitro (35, 37) and in vivo  
99 in a murine model (34), their use in clinical practice can be limited by side effects (both), cost  
100 (daptomycin), parenteral administration (daptomycin) and poor CNS penetration (daptomycin)  
101 (38).

102

103 Importantly, botanical medicines have been shown to have in vitro antimicrobial activity against  
104 various morphologic forms of *B. burgdorferi*. Because there are a limited number of studies  
105 evaluating the effects of botanical medicine on *B. burgdorferi*, it is helpful to draw on clinical  
106 studies that have shown benefit using botanical medicines for other spirochetal infections and  
107 infections like mycobacterium that are known to form antibiotic tolerant persister cells (39). For  
108 example, *Andrographis* has been shown to effectively treat leptospirosis in Chinese clinical trials  
109 (40, 41) and improve clinical outcomes when combined with standard antituberculosis treatment for  
110 TB (42).

111

112 Botanical medicine has a long history of use, beginning almost 5000 years ago in Mesopotamia and  
113 over 3000 years of documented usage in China (43, 44). The safety of botanical medicines has been  
114 documented in various traditional systems of medicine such as Ayurvedic Medicine and Traditional  
115 Chinese Medicine over centuries. Recent retrospective and systematic reviews in the European  
116 Union and South America have concluded severe adverse events associated with Botanical  
117 Medicine usage were rare (45-47).

118  
119 This study builds on previous studies that used our in vitro stationary phase persister model and  
120 SYBR Green I/propidium iodide (PI) assay to screen potential antimicrobial candidates. Having  
121 previously identified novel drugs and drug combinations from an FDA drug library (36), as well as  
122 selected botanicals in essential oil form that have anti-*B. burgdorferi* activity (48, 49), in the present  
123 study we investigated the effect of 12 botanical medicines and 3 other natural antimicrobial agents  
124 for potential anti-*B. burgdorferi* activity in vitro.

125

## 126 **Materials and Methods**

127

### 128 **Strain, media, and culture techniques**

129 *B. burgdorferi* strain B31 was cultured in BSK-H medium (HiMedia Laboratories Pvt. Ltd.) with 6%  
130 rabbit serum (Sigma-Aldrich, St. Louis, MO, USA). All culture medium was filter-sterilized by 0.2  
131 µm filter. Cultures were incubated in sterile 50 ml conical tubes (BD Biosciences, CA, USA) in  
132 microaerophilic incubator (33°C, 5% CO<sub>2</sub>) without antibiotics.

133

### 134 **Botanical and natural medicines**

135 A panel of natural product extracts: *Polygonum cuspidatum*, *Cryptolepis sanguinolenta*, *Artemisia*  
136 *annua*, *Juglans nigra*, *Uncaria tomentosa*, *Scutellaria baicalensis*, *Stevia rebaudiana*, *Cistus*  
137 *incanus*, *Andrographis paniculata* (Chuan Xin Lian), *Ashwagandha somnifera*, *Dipsacus fullonum*  
138 *rad*, grapefruit seed extract, LL37, monolaurin, colloidal silver and relevant solvent controls (see  
139 Table 2) were identified. The botanical medicines or natural products were chosen based on  
140 anecdotal clinical usage and preclinical data from the literature. Primary criteria for selecting  
141 compounds for the present study included agents that had shown significant anti-borrelial effects in  
142 previous studies, have favorable safety profiles and can be absorbed systemically. Additional  
143 criteria for selecting compounds included anecdotal reports from patients and/or providers, anti-  
144 biofilm effects and ability to cross the blood brain barrier.

145

146 Botanical medicines were sourced from KW Botanicals (San Anselmo, California) and Heron  
147 Botanicals (Kingston, Washington). Botanicals were identified via macroscopic and organoleptic  
148 methods and voucher specimens are on file with the respective production facilities. Most botanical  
149 medicines were provided as alcohol extracts at 30%, 60%, and 90% alcohol, and the alcohol used  
150 was also tested separately as a control in different dilutions. Monolaurin (Lauricidin™ brand)  
151 (Dissolved in 100% DMSO), and colloidal silver (Argentyn™ brand) were purchased  
152 commercially. LL37 and a control was obtained from Taylor Made Pharmacy in Nicholasville, KY.  
153 Citrosept™ (Cintamani, Poland) and Nutribiotic™ grapefruit seed extract products and a control  
154 were purchased commercially. See Table 2 for additional details on sourcing, testing and validation  
155 of botanical and natural medicines used.

156

157 Doxycycline (Dox) and cefuroxime (CefU) (Sigma-Aldrich, USA) were dissolved in suitable  
158 solvents [2, 3] to form 5 mg/ml stock solutions. The antibiotic stocks were filter-sterilized by 0.2  
159 µm filter and stored at -20°C.

160

### 161 **Microscopy**

162 *B. burgdorferi* spirochetes and aggregated microcolonies treated with natural products or control  
163 drugs were stained with SYBR Green I and PI (propidium iodide) and checked with BZ-X710 All-

164 in-One fluorescence microscope (KEYENCE, Itasca, IL, USA). The bacterial viability was  
165 performed by calculating the ratio of green/red fluorescence to determine the ratio of live and dead  
166 cells, as described previously [4, 5]. The residual cell viability reading was obtained by analyzing  
167 three representative images of the same bacterial cell suspension taken by fluorescence microscopy.  
168 To quantitatively determine the bacterial viability from microscope images, Image Pro-Plus  
169 software was employed to evaluate fluorescence intensity as described previously [6].

170

### 171 **Evaluation of natural products for their activity against *B. burgdorferi* stationary phase** 172 **cultures**

173 *B. burgdorferi* B31 was cultured for 7 days in microaerophilic incubator (33°C, 5% CO<sub>2</sub>) as  
174 stationary phase cultures (~10<sup>7-8</sup> spirochetes/mL). To evaluate potential anti-persister activity of the  
175 natural products, their stocks and their control solvents were added to 100 µL of the *B. burgdorferi*  
176 stationary phase culture in 96-well plate to obtain the desired concentrations. The botanical  
177 medicines and natural product extracts were tested with the concentration of 1%, 0.5% and 0.25%  
178 (v/v); antibiotics of daptomycin, doxycycline and cefuroxime were used as control at a final  
179 concentration of 5 µg/ml. All the tests mentioned above were run in triplicate. The microtiter plates  
180 were sealed and incubated at 33°C without shaking for 7 days with 5% CO<sub>2</sub>.

181

### 182 **Subculture studies to confirm the activity of the top natural product hits**

183 For the subculture study, 1 mL *B. burgdorferi* stationary phase culture was treated by natural  
184 products or control drugs in 1.5 ml Eppendorf tubes for 7 days at 33 °C without shaking. Next, cells  
185 were centrifuged, and cell pellets were washed with fresh BSK-H medium (1 mL) followed by  
186 resuspension in fresh BSK-H medium without antibiotics. Then 50 µl of cell suspension was  
187 inoculated into 1 ml of fresh BSK-H medium for subculture at 33 °C, 5% CO<sub>2</sub>. Cell growth was  
188 monitored using SYBR Green I/PI assay and fluorescence microscopy after 7-20 days.

189

## 190 **Results**

191

### 192 **Evaluation of activity of natural product extracts against stationary phase *B. burgdorferi***

193 We tested a panel of botanical medicines and natural product extracts and their corresponding  
194 controls against a 7-day old *B. burgdorferi* stationary phase culture in 96-well plates incubated for 7  
195 days. Table 1 summarizes the activity of these natural product extracts against the stationary phase  
196 *B. burgdorferi* culture at 1%, 0.5% and 0.25%. Among them, 12 natural product extracts at 1%  
197 were found to have strong activity against the stationary phase *B. burgdorferi* culture compared to  
198 the control antibiotics doxycycline and cefuroxime (Table 1). To eliminate auto-fluorescence  
199 background, we checked the ratio of residual live cells and dead cells by examining microscope  
200 images as described previously [7]. Using fluorescence microscopy, we confirmed that 1%  
201 *Cryptolepis sanguinolenta*, *Juglans nigra*, and *Polygonum cuspidatum* could eradicate almost all  
202 live cells with only dead and aggregated cells left as shown in Figure 1. At 0.5% concentration, 11  
203 natural product extracts (*Polygonum cuspidatum* 60% EE, *Cryptolepis sanguinolenta* 60% EE,  
204 *Artemisia annua* 90% EE, *Juglans nigra* 30%-60% EE, *Uncaria tomentosa* WE, *Artemisia annua*  
205 60% EE, *Polygonum cuspidatum* 90% EE, *Scutellaria baicalensis* 30%-90% EE) still exhibited  
206 stronger activity than the current clinically used doxycycline and cefuroxime (Table 1; Figure 1).  
207 Among them, the most active natural product extracts were *Cryptolepis sanguinolenta* 60% EE,  
208 *Polygonum cuspidatum* 60% EE, *Artemisia annua* 90% EE, *Juglans nigra* 60% EE, *Uncaria*  
209 *tomentosa* WE, *Artemisia annua* 60% EE, because of their outstanding activity even at 0.25%, as

210 shown by better activity than control drugs (Table 1 and Figure 1). In particular, 0.25% *Cryptolepis*  
211 *sanguinolenta* could eradicate or dissolve all the *B. burgdorferi* cells including aggregated forms as  
212 we found rare live and even dead cells with SYBR Green I/PI microscope observation (Figure 1).  
213 Although *Juglans nigra* could eradicate almost all stationary phase *B. burgdorferi* cells at 0.5%  
214 (Figure 1), it could not kill the aggregated microcolony form at 0.25% as shown by many live  
215 (green) microcolonies by SYBR Green I/PI microscopy. Although the plate reader data showed  
216 *Polygonum cuspidatum* 60% ethanol extract had the strongest activity at 0.25%, the microscope  
217 result did not confirm it due to higher residual viability than that of *Cryptolepis sanguinolenta* and  
218 *Juglans nigra* (Figure 1).

219  
220 We also tested several other herbs and substances that are used by Lyme patients including *Stevia*  
221 *rebaudiana*, *Andrographis paniculata*, Grapefruit seed extract, *Ashwagandha somnifera*, Colloidal  
222 silver, Lauricidin, and antimicrobial peptide LL-37, but found they had little or no activity against  
223 stationary phase *B. burgdorferi* cells.

224  
225 **MIC values of the active natural product extracts**  
226 Because the activity of antibiotics against non-growing *B. burgdorferi* is not always correlated with  
227 their activity against growing bacteria [7], we therefore determined the MICs of these natural  
228 product extracts against the replicating *B. burgdorferi* as described previously [8]. The MIC values  
229 of some natural product extracts such as *Artemisia annua*, *Juglans nigra*, *Uncaria tomentosa* were  
230 quite high for growing *B. burgdorferi*, despite their strong activity against the non-growing  
231 stationary phase *B. burgdorferi* cells (Table 1). On the other hand, the top two active natural  
232 product extracts *Cryptolepis sanguinolenta* and *Polygonum cuspidatum* showed strong activity  
233 against the growing *B. burgdorferi* with a low MIC (0.03%-0.06% and 0.25%-0.5% respectively)  
234 and also non-growing stationary phase *B. burgdorferi* (Table 1).

235  
236 **Subculture studies to evaluate the activity of natural product extracts against stationary**  
237 **phase *B. burgdorferi***  
238 To confirm the activity of the natural product extracts in eradicating the stationary phase *B.*  
239 *burgdorferi* cells, we performed subculture studies as previously described [6]. We further tested  
240 the top active natural product extracts (*Cryptolepis sanguinolenta*, *Polygonum cuspidatum*,  
241 *Artemisia annua*, *Juglans nigra*, and *Scutellaria baicalensis*) to ascertain if they could eradicate  
242 stationary phase *B. burgdorferi* cells at 1% or 0.5% by subculture after the treatment (Table 1).  
243 Treatment with 1% *Cryptolepis sanguinolenta* extract caused no regrowth in the subculture study  
244 (Table 1, Figure 2). However, the other natural product extracts including *Polygonum cuspidatum*,  
245 *Artemisia annua*, *Juglans nigra*, and *Uncaria tomentosa* could not eradicate *B. burgdorferi*  
246 stationary phase cells as many spirochetes were still visible after 21-day subculture (Table 1, Figure  
247 2). At 0.5%, all the natural product extracts treated samples grew back after 21-day subculture  
248 (Table 1, Figure 2), however, only one of the three *Cryptolepis sanguinolenta* extract treated  
249 samples grew back. This indicates that 0.5% *Cryptolepis sanguinolenta* extract still has strong  
250 activity and could almost eradicate the stationary phase *B. burgdorferi* cells. By contrast, the  
251 clinically used antibiotics doxycycline and cefuroxime at clinically relevant concentration (5 µg/ml)  
252 could not sterilize the *B. burgdorferi* stationary phase culture, since spirochetes were visible after  
253 21-day subculture (Table 1).

254  
255

256

## 257 **Discussion**

258

259 In this study, we evaluated a panel of botanical medicines and natural products commonly used by  
260 some patients to manage their persisting symptoms of Lyme disease and found that indeed some of  
261 them have strong activity against *B. burgdorferi*. These include *Cryptolepis sanguinolenta*,  
262 *Polygonum cuspidatum*, *Juglans nigra*, *Artemisia annua*, *Uncaria tomentosa*, *Cistus incanus*, and  
263 *Scutellaria baicalensis*. These findings may provide some basis for the clinical improvement of  
264 patients who take these medicines and also indirectly suggest their persisting symptoms may be due  
265 to persistent bacteria that are not killed by conventional Lyme antibiotic treatment. Since these  
266 herbs contain different components and their effects in patients may also be due to their effects on  
267 host systems in addition to their potent antimicrobial effect. Surprisingly, *Andrographis paniculata*,  
268 *Stevia rebaudiana* (50), Colloidal silver (Argentyn 23), Monolaurin (Lauricidin), *Dipsacus spp*, and  
269 *Ashwagandha somnifera*, which are assumed or previously reported to have anti-borrelia activity,  
270 did not show significant activity against either stationary phase or growing *B. burgdorferi* in our in  
271 vitro study, and it is possible that their beneficial effects seen in patients may be in part due to their  
272 activity on host immune system.

273

### 274 *Cryptolepis sanguinolenta*

275

276 *Cryptolepis sanguinolenta* is a plant indigenous to Africa where it has been used in traditional  
277 medicine to treat malaria, TB, hepatitis, and septicemia (51). In addition to the various uses  
278 documented in ethnomedicine, *Cryptolepis sanguinolenta* has been shown in preclinical studies to  
279 have anti-inflammatory (52, 53) antibacterial (54-59), Anti-fungal (55, 60), anti-amoebic (61) and  
280 anti-malarial (62-65) properties. Two preliminary clinical studies have shown *Cryptolepis* to have  
281 significant efficacy in treating uncomplicated malaria without signs of overt toxicity (66, 67).

282

283 While multiple secondary metabolites with antimicrobial activity have been identified, an alkaloid  
284 called cryptolepine has been the most well-studied to date. Cryptolepine's antimicrobial activity is  
285 thought to be secondary to multiple mechanisms of action including both bactericidal and  
286 bacteriostatic effects (54). More specifically, cryptolepine has been shown to cause morphologic  
287 changes and cellular breakdown (60, 68), as well as DNA intercalating and topoisomerase II  
288 inhibiting effects (69-73).

289

290 It should be noted that, in addition to cryptolepine, other constituents in *Cryptolepis sanguinolenta*  
291 have also been shown to have antimicrobial activity (56). A concept in botanical medicine  
292 postulates that using a whole plant extract offers several potential advantages over the use of a  
293 single constituent, including multiple mechanisms of action, synergism and, in some cases,  
294 improved bioavailability as well as less side effects. An example of the clinical benefit in using  
295 whole plant extracts over single constituents or analogues may be emerging from the current use of  
296 artemisinin-based combination therapy (ACT) for malaria where significant resistance has emerged  
297 (74, 75) whereas preliminary studies show improved efficacy and reduce side-effects compared to  
298 whole plant treatment (76, 77).

299

300 *Cryptolepis sanguinolenta* is generally well tolerated and few side effects have been documented in  
301 humans even with its relatively long-term use in parts of China and India. Rat studies indicate that  
302 doses of the extract up to 500 mg/kg are relatively safe (78). However, higher doses induced  
303 CNS toxicity, thrombocytosis and inflammation in target organs. LD50 was estimated at greater  
304 than 3000 mg/kg (79). *Cryptolepis sanguinolenta* was shown in a rat model to lower testosterone  
305 levels and reduce sperm counts (80). However, this study was done with a preparation from the  
306 leaf of the plant and in Western botanical medicine the root is generally used. Additional studies  
307 would be needed to clarify if *Cryptolepis sanguinolenta* has anti-androgenic or anti-spermatogenic  
308 effects in humans.

309 Importantly, a novel finding of this current study is the fact that *Cryptolepis sanguinolenta* has  
310 strong activity against growing *B. burgdorferi* with low MIC and also non-growing stationary phase  
311 *B. burgdorferi* (Table 1, Fig. 1 and 2). Due to the fact that *Cryptolepis sanguinolenta* is traditionally  
312 used against malaria, in the Lyme treatment community it has been used for treatment of *Babesia*  
313 *spp* (81) which can be a co-infecting, malaria like organism. To our knowledge, the anti-*Borrelial*  
314 effect of *Cryptolepis sanguinolenta* has not previously been documented and further in vitro and in  
315 vivo studies are warranted to investigate the potential role *Cryptolepis sanguinolenta* may serve in  
316 the treatment of Lyme disease.

### 317 *Juglans nigra*

318

319 *Juglans nigra* and its constituents have been shown to have anti-oxidant, anti-bacterial, anti-tumor  
320 and chemoprotective effects (82-84). Previous in vitro testing has documented that *Juglans nigra*  
321 exhibited bacteriostatic activity against log phase spirochetes of *Borrelia burgdorferi* and *Borrelia*  
322 *garinii* and bactericidal activity against *Borrelia* round bodies (85). Two different commercially  
323 available botanical formulations which contain *Juglans nigra* were also recently shown to have  
324 activity against log phase spirochetes of *B. burgdorferi* strain GCB726, round bodies and biofilm  
325 formation in in vitro testing (86). This current study adds to the research on the potential anti  
326 *Borrelia* activity of *Juglans nigra* which has been shown to have several constituents (87) with  
327 antimicrobial properties including juglone (5-hydroxy-1,4-naphthalenedione), phenolic acids,  
328 flavonoids, and catechins (including epigallocatechin gallate) (88-93). Further studies are needed to  
329 elucidate which constituents have anti-borrelial activity.

330

331 *Juglans nigra* is well tolerated with uncommon side effects. In some individuals, it can cause  
332 gastrointestinal disturbance/upset stomach (Natural Medicines Monograph: Black Walnut accessed  
333 3/4/19). There can be some cross reactivity in terms of allergy in those allergic to tree nuts or  
334 walnuts, as well as cases of dermatitis reported in humans and laminitis in horses (94-96),. In  
335 addition, *Juglans nigra* can induce changes in skin pigmentation (97, 98). The active compound  
336 juglone was found to have an oral LD50 in rats of 112 mg/kg (99).

### 337 *Polygonum cuspidatum* (Japanese Knotweed)

338



339 *Polygonum cuspidatum* is commonly used by Lyme disease patients manage their symptoms (81)  
340 and its constituents have been shown to have anti-tumor, antimicrobial, anti-inflammatory,  
341 neuroprotective, and cardioprotective effects (100-104). One of the active constituents found in  
342 *Polygonum cuspidatum* is a polyphenol called resveratrol. Previous in vitro testing has documented  
343 that resveratrol exhibited activity against log phase spirochetes of *Borrelia burgdorferi* and *Borrelia*  
344 *garinii*, minimal activity against borrelia round bodies, and no significant activity against borrelia  
345 associated biofilms (85). Emodin (6-methyl-1,3,8-trihydroxyanthraquinone), another active  
346 constituent in *Polygonum cuspidatum*, has been shown to have activity against stationary phase *B.*  
347 *burgdorferi* cells (105). Preclinical research has documented *Polygonum cuspidatum* to have  
348 antibacterial effects against *Vibrio vulnificus* (106), *Streptococcus mutans* (107) and streptococcus  
349 associated biofilms (108). The antibacterial activity of *P. cuspidatum* has been attributed to its  
350 stilbenes (including resveratrol) and hydroxyanthraquinone content (109).

351  
352 *Polygonum cuspidatum* has been found to have minimal toxicity in animal and human studies,  
353 although gastrointestinal upset and diarrhea can occur but resolves with decreasing or stopping the  
354 intake (110, 111). In safety studies of a purified product, trans-resveratrol did not cause any adverse  
355 effects in rats at up to 700 mg/kg bw/day when administered for up to 90 days (112). While few  
356 studies have been performed in humans, a 2010 review found that it is well absorbed, rapidly  
357 metabolized, mainly into sulfo and glucuronide conjugates which are eliminated in urine.  
358 Resveratrol seems to be well tolerated and no marked toxicity was reported. These data are  
359 important in the context of human efficacy studies, and they provide further support for the use of  
360 resveratrol as a pharmacological drug in human medicine (113). Interestingly, intestinal bacteria  
361 played an important role in the metabolism (114).

### 362 *Artemisia annua*

363  
364 *Artemisia annua* (Sweet wormwood also called Chinese wormwood and Qing Hao) is a medicinal  
365 plant that has been used for medicinal purposes for over 2000 years (115) and the isolation of an  
366 active constituent called artemisinin by was awarded the Nobel Prize in 2015 in recognition of  
367 artemisinin's role in significantly reducing the morbidity and mortality associated with malaria  
368 (116-118). The anti-*Borrelia* activity of *Artemisia annua* found in this current study adds to the  
369 fact that artemisinin has previously been shown to have significant activity against stationary phase  
370 *B. burgdorferi* persists in in vitro models (36, 119). A small pilot study demonstrated that a  
371 synthetic analog to artemisinin, called artesunate, showed a significant reduction in short term  
372 memory impairment in patients with Lyme disease when combined with intravenous ceftriaxone  
373 (120).

374  
375 Artemisinin's mechanism of action for treating Plasmodium infections is not completely understood  
376 (121), but is thought to be related to its ability to generate free radicals that damage parasite  
377 proteins (122, 123).

378  
379 The artemisinin content of the *Artemisia annua* sample used in the present study was confirmed to

380 be 0.11% by high-performance liquid chromatography/UV-visual spectroscopy at the Institute for  
381 Food Safety and Defense (Centralia, WA). Good quality *Artemisia annua* should generally  
382 contain >0.3% artemisinin. Despite suboptimal levels of artemisinin present in the *Artemisia annua*  
383 used for the present study, both 60% and 90% alcohol extracts of *Artemisia annua* exhibited better  
384 activity against stationary phase *B. burgdorferi* compared to the control antibiotics cefuroxime and  
385 doxycycline. This is consistent with the previous in vitro data demonstrating artemisinin's ability  
386 to reduce round bodies of *B. burgdorferi* (36).

387  
388 *Artemisia annua* is generally considered safe provided that the product administered is free of or  
389 low in thujone and other terpene derivatives that are potentially neurotoxic (124). Rat studies found  
390 that the NOAEL (no-observed-adverse-effect-level) of *Artemisia annua* extract in rats was  
391 estimated to be equivalent to 1.27 g/kg/day in males and 2.06 g/kg/day in females) or more (125).  
392 In humans, *Artemisia annua* has been used safely in doses up to 2250 mg daily for up to 10 weeks  
393 (124), and 1800 mg daily have also been used safely for up to 6 months (124). Some  
394 gastrointestinal upset including mild nausea, vomiting (more rare), and abdominal pain can occur at  
395 higher doses (126, 127).

396

#### 397 *Scutellaria baicalensis*

398

399 *Scutellaria baicalensis* and its constituents have been shown to have neuroprotective, antioxidant,  
400 anti-apoptotic, anti-inflammatory and anti-excitotoxicity (128-131). One of the active constituents  
401 found in *Scutellaria baicalensis*, baicalein, was found to exhibit in vitro activity against various  
402 morphologic forms of *B. burgdorferi* and *B. garinii*, including log phase spirochetes, latent round  
403 bodies and biofilm formations (132). This current study adds to the research on the anti-*Borrelia*  
404 activity of *Scutellaria baicalensis*. This botanical and/or baicalein have also been shown to have  
405 antimicrobial activity (133, 134), synergistic effects with antibiotics (135-139) and reduce biofilm  
406 formation in *Pseudomonas aeruginosa* models (140, 141).

407

408 *Scutellaria baicalensis* has been used safely in clinical use (142-144), and has a long historical  
409 record of safety. There are reports of sedation and it has been shown to be active on the GABA  
410 receptor sites (though this is frequently used to help anxiety and sleep)(145) (145-147). A  
411 medical food combination of purified *Scutellaria baicalensis* and the bark of *Acacia catechu*  
412 containing baicalin and catechin, concentrated and standardized to greater than 90% purity  
413 (Limbrel™, Move Free Advanced™) caused reversible liver damage in at least 35 cases, with  
414 a calculated estimated incidence of approximately 1 in 10,000 (148, 149). These commercial  
415 products have since been withdrawn from the market. Similar hepatotoxicity is generally not  
416 seen from the whole plant extract. Despite the case reports of hepatotoxicity, a dose of 1000  
417 mg/kg daily was identified as the no-observed-adverse-effect level (NOAEL) for this  
418 commercial product was given in animal studies for 90 days (150). Another study demonstrated  
419 no teratogenicity on *Scutellaria baicalensis* when given to pregnant mice at doses up to  
420 32g/kg/day (151).

421

422 *Uncaria tomentosa*

423  
424 *Uncaria tomentosa* is an important medicinal plant from South and Central America and has been  
425 shown to have neuroprotective effects in preclinical studies (152) (and in preliminary human  
426 studies has been shown to improve quality of life in individuals with cancer (153), enhanced DNA  
427 repair (154), and symptom improvement in individuals with rheumatoid arthritis (155) and  
428 osteoarthritis (156). The potential antimicrobial effects of *Uncaria tomentosa* have not been widely  
429 evaluated. In a non-peer reviewed publication, *Uncaria tomentosa* was reported to have anti-  
430 borrelial effects in an in vitro model (157). *Uncaria tomentosa* has been shown in peer reviewed  
431 research to have antimicrobial effects against human oral pathogens (158, 159).

432  
433 *Uncaria tomentosa* has been found to be safe and to have minimal side effects in a variety of animal  
434 and human studies (154). Human studies ranging from four weeks (156) to 52 weeks (155)  
435 demonstrated side effects comparable to placebo. While gastrointestinal complaints such as nausea,  
436 diarrhea, abdominal pain, and anemia, were reported, it was thought that the group of solid tumor  
437 patients had experienced health issues from disease progression and not necessarily from the  
438 *Uncaria* (153). One case report was made of allergic interstitial nephritis in a patient with SLE  
439 whose kidney function worsened when taking an *Uncaria tomentosa* product and improved upon  
440 discontinuation (160). LD50 of several different preparations of *Uncaria tomentosa* was found to  
441 range from 2-8 g/kg bodyweight (McKenna DJ, Jones K, Hughes K, Humphrey S, editors.  
442 Botanical Medicines. The desk reference for Major Herbal Supplements. 2nd ed. The Haworth  
443 Herbal Press, Binghamton, NY USA 2002). Another study calculated the acute median lethal dose  
444 in mice to be greater than 16 g/kg body weight (161).

445  
446 *Cistus creticus*

447  
448 It has been proposed that *Cistus incanus* and *Cistus creticus* are synonymous ([theplantlist.org](http://theplantlist.org))  
449 while other sources have suggested that *Cistus creticus* is a subspecies of *Cistus incanus* (162).  
450 Preliminary clinical studies have shown significant improvement in upper respiratory infection and  
451 inflammatory markers in patients taking *Cistus incanus* (163, 164), A volatile oil extract of *Cistus*  
452 *creticus* has been shown to have anti-borrelial effects in an in vitro model (165). Additional in vitro  
453 studies have shown *Cistus creticus* to have antimicrobial effects against several bacteria including  
454 *Pseudomonas aeruginosa*, *Klebsiella pneumoniae* (162), *Streptococcus oralis*, *Staphylococcus*  
455 *aureus*, *Porphyromonas gingivalis*, *Prevotella intermedia*, *Fusobacterium nucleatum* and  
456 *Parvimonas micra* (166). *Cistus creticus* also demonstrated significant inhibition of *Streptococcus*  
457 *mutans* biofilm formation (166) and reduction in bacterial adherence to enamel (167). *Cistus*  
458 *creticus* has been shown to contain several active constituents (168), including carvacrol (165).  
459 Given that our lab previously documented carvacrol to have a significant activity against log and  
460 stationary phase *B. burgdorferi* cells, it is possible that the carvacrol content in the *Cistus incanus*

461 sample tested in the present study contributed to the significant reduction in long and stationary  
462 phase *B. burgdorferi* cells in the present study

463  
464 *Cistus incanus* plant extracts have been used for centuries in traditional medicine without reports of  
465 side effects or allergic reactions (169). In a randomised placebo controlled study of 160 patients,  
466 220 mg per day *Cistus incanus* was well tolerated with less adverse effects than in the placebo  
467 group (163). In a similar study comparing *Cistus incanus* to green tea, less adverse effects was  
468 again seen in the *Cistus incanus* group compared to the green tea group (164). While  
469 pharmacokinetic safety data is sparse, a cell culture study showed that *Cistus incanus* did not cause  
470 any adverse changes on cell proliferation, survival, or cellular receptor function (169).

471  
472 Grapefruit seed extract

473  
474 Grapefruit seed extract (GSE) was previously reported to have activity against motile and cystic  
475 morphologic forms of borrelia bacteria in an in vitro model in a 2007 publication (170). In contrast,  
476 the current study did not demonstrate any meaningful activity against log phase or stationary phase  
477 *B. burgdorferi*. There are several potential reasons to explain the difference in results between the  
478 current study and the 2007 study including differences in GSE formulations and/or different  
479 borrelia species used in culture. In the current study we used *B. burgdorferi* strain b31 whereas the  
480 2007 study cites "*B. afzelii* ACA-1" was used. While both studies used Citrosept™ brand GSE  
481 the formulation has been modified since 2007 and currently holds an "organic" designation.  
482 Because previous studies have documented several contaminants in commercial GSE formulations,  
483 including Benzalkonium chloride, triclosan and methylparaben (171-173), we screened the GSE  
484 products for contaminants prior to inclusion in our present study. The Citrosept™ sample was  
485 found to have no detectable levels of contaminants and therefore was used as the GSE source in the  
486 current study. In contrast, a second commercially available brand of GSE (Nutribiotic™) did test  
487 positive for elevated levels of Benzalkonium chloride, which is a known antimicrobial compound  
488 (174) and has been implicated in drug-herb interactions causing potential safety concerns for  
489 patients taking GSE (175). The 2007 study did not note testing for contaminants so it is possible  
490 that the 2007 formulation of Citrosept™ contained a contaminant that exerted anti-borrelial activity.

491  
492 *Stevia rebaudiana*

493  
494 *Stevia rebaudiana* was recently reported to have strong anti-borrelia activity (50). However, in our  
495 testing, *Stevia rebaudiana* failed to show activity against *B. burgdorferi*. One possibility to explain  
496 this discrepancy is that the study that reported *Stevia rebaudiana* having activity against *B.*  
497 *burgdorferi* did not have appropriate alcohol control and that the anti-borrelial effect seen with the  
498 *Stevia rebaudiana* alcohol extract may not be due to *Stevia rebaudiana* but due to a non-specific  
499 alcohol effect on the *Borrelia* bacteria. Since we obtained *Stevia rebaudiana* preparation from an  
500 experienced herbalist who extracted *Stevia rebaudiana* using a known concentration of alcohol, we  
501 were able to know the alcohol concentration in the preparation and when we used proper alcohol  
502 controls we did not find *Stevia rebaudiana* to have any activity against *B. burgdorferi* (Table 1).

503  
504 *Andrographis paniculata*  
505  
506 *Andrographis paniculata* (Chuan Xin Lian) has been used to treat febrile diseases and infections  
507 caused by syphilis, malaria, and worms, and is recommended as anti-spirochetal treatment in the  
508 Buhner Lyme disease book (106). However, we found *Andrographis* failed to show any apparent  
509 activity against *B. burgdorferi* in our in vitro testing. It is possible that *Andrographis* indirectly acts  
510 on the host immune system to kill *B. burgdorferi* or have a non-specific host response. Further  
511 studies are needed to test the possible effect of *Andrographis* on the host immune cells.

512  
513 Other substances or compounds used by Lyme patients such as Colloidal silver, Monolaurin,  
514 Grapefruit seed extract, and antimicrobial peptide LL-37 did not exhibit good activity against *B.*  
515 *burgdorferi* in our testing.

## 516 517 **Conclusion**

518  
519 In conclusion, we tested a panel of herbal natural products that are most commonly used by Lyme  
520 disease patients for their activity against *B. burgdorferi* and found several to be highly active  
521 including *Cryptolepsis sanguinolenta*, *Juglans nigra*, *Polygonum cuspidatum*, *Uncaria tomentosa*,  
522 *Artemisia annua*, *Cistus creticus*, and *Scutellaria baicalensis*. However, we found that *Stevia*  
523 *rebaudiana*, *Andrographis paniculata*, Grapefruit seed extract, colloidal silver, monolaurin, and  
524 antimicrobial peptide LL37 had little or no activity against *B. burgdorferi* in our in vitro model.  
525 Future studies are needed to identify the active ingredients of the effective herbs and to evaluate  
526 their potential for more effective treatment of persistent Lyme disease in animal models and in  
527 patients.

528  
529 While this current study has identified novel new botanical and natural medicines with in vitro anti-  
530 *Borrelia* activity, it is also notable that many compounds tested did not show direct anti-*Borrelia*  
531 activity despite the fact that they are widely used, with reported clinical efficacy, by patients and  
532 practitioners in the community setting. It is important to consider the potential limitations of the in  
533 vitro model given that it exists outside of the biological organism. The in vitro model can provide  
534 information with regards to direct antimicrobial activity, and while botanical and natural medicines  
535 can be effective from direct antimicrobial activity, frequently part of their function is via diverse  
536 pathways which are not directly antimicrobial. For example, they can exert effects via anti-  
537 inflammatory/anti-cytokine activity, immune system regulation/augmentation, adaptogenic  
538 stimulation of cellular and organismal defense systems, and biofilm disruption to name a few (see  
539 discussion section). In these activities, the mechanisms of the medicines rely on complex interplay  
540 and interaction between different body systems, which can only occur within the intact, living  
541 organism. Because the in vitro model is unable to provide information with regards to alternative  
542 pathways through which natural botanical medicines act, it is important that future in vivo studies  
543 be performed to investigate the activity and efficacy of these and other botanical and natural  
544 medicines against *Borrelia* and other tick-borne diseases.

545

546 These types of studies will be of vital importance given the multiple factors at play with the current  
 547 epidemic of tick-borne diseases in our society and globally. While research is beginning to provide  
 548 information on novel antibiotic combinations as well as agents previously not used for this purpose  
 549 (34) that might be effective against the multiple forms of the *Borrelia* bacteria, there is ongoing  
 550 concern and care is required regarding issues of responsible stewardship of antibiotic use and  
 551 antibiotic resistance. It is also important to recognize that, while being cognizant of specific side  
 552 effects and interactions, botanical and natural medicines generally have a favorable safety profile  
 553 compared to prescription antibiotics and have a broader spectrum of action with multiple  
 554 synergistic compounds present within a single plant. Furthermore, using multiple botanical  
 555 medicines in combination can further increase synergy and lower the risk of pathogen resistance  
 556 development.

557  
 558 Finally, given the need for novel antimicrobials that are active against the persistent form of the  
 559 *Borrelia* bacteria which is difficult to treat even with conventional antibiotic approaches, additional  
 560 research is critical to identify the active components of the effective hits and evaluate the activity of  
 561 active botanical medicines in combination against *Borrelia* persists in vitro and in vivo in the  
 562 mouse model of *Borrelia* infection and in subsequent clinical studies.

### 563 564 **Acknowledgments**

565  
 566 We thank herbalists Eric Yarnell, Brian Kie Weissbuch, and Mischa Grieder ND for providing  
 567 herbal extracts for evaluation in this study and for helpful discussions. We acknowledge the support  
 568 of this work by the Bay Area Lyme Foundation.

569  
**Table 1. Activity of natural products against growing (MIC) and stationary phase *B. burgdorferi*.**

| Natural products                         | MIC (%) <sup>a</sup> | Stationary phase residual viability (%) at different concentrations of herbs <sup>b</sup> |            |            | Subculture |                |
|------------------------------------------|----------------------|-------------------------------------------------------------------------------------------|------------|------------|------------|----------------|
|                                          |                      | 1%                                                                                        | 0.5%       | 0.25%      | 1%         | 0.5%           |
| Drug free control                        |                      | 94%                                                                                       |            |            | +          |                |
| 5 µg/ml Doxycycline                      | 0.25 µg/mL           | 74%                                                                                       |            |            | +          |                |
| 5 µg/ml Cefuroxime                       | 0.13 µg/mL           | 65%                                                                                       |            |            | +          |                |
| 30% alcohol control                      | >2%                  | 79%                                                                                       | 80%        | 95%        | +          | +              |
| 60% alcohol control                      | 1%-2%                | 77%                                                                                       | 76%        | 94%        | +          | +              |
| 90% alcohol control                      | 0.5%-1%              | 75%                                                                                       | 79%        | 91%        | +          | +              |
| <i>Polygonum cuspidatum</i> 60% EE       | <b>0.25%-0.5%</b>    | <b>30%</b>                                                                                | <b>41%</b> | <b>43%</b> | +          | +              |
| <i>Cryptolepis sanguinolenta</i> 60% EE  | <b>0.03%-0.06%</b>   | <b>46%</b>                                                                                | <b>48%</b> | <b>46%</b> | -          | + <sup>c</sup> |
| <i>Artemisia annua</i> 90% EE            | 0.5%-1%              | <b>43%</b>                                                                                | <b>50%</b> | <b>49%</b> | +          | +              |
| <i>Juglans nigra</i> 60% EE              | 0.5%-1%              | <b>14%</b>                                                                                | <b>36%</b> | <b>53%</b> | +          | +              |
| <i>Uncaria tomentosa</i> (inner bark) WE | 1%-2%                | <b>49%</b>                                                                                | <b>47%</b> | <b>54%</b> | +          | +              |
| <i>Polygonum cuspidatum</i> 90% EE       | <b>0.25%-0.5%</b>    | <b>21%</b>                                                                                | <b>43%</b> | 61%        | +          | +              |
| <i>Juglans nigra</i> 30% EE              | 1%-2%                | <b>33%</b>                                                                                | <b>50%</b> | 62%        | +          | +              |

|                                                      |                    |            |            |     |    |    |
|------------------------------------------------------|--------------------|------------|------------|-----|----|----|
| <i>Scutellaria baicalensis</i>                       | >2%                | <b>59%</b> | 60%        | 62% | +  | +  |
| <i>Cryptolepis sanguinolenta</i> 90% EE              | <b>0.03%-0.06%</b> | <b>48%</b> | <b>47%</b> | 63% | ND | ND |
| <i>Juglans nigra</i> 90% EE                          | 0.5%-1%            | <b>34%</b> | <b>56%</b> | 63% | ND | ND |
| <i>Cryptolepis sanguinolenta</i> 30% EE <sup>d</sup> | <b>0.06%-0.13%</b> | <b>59%</b> | <b>64%</b> | 63% | ND | ND |
| <i>Juglans nigra</i> fruc                            | 1%-2%              | <b>52%</b> | <b>59%</b> | 66% | ND | ND |
| <i>Scutellaria baicalensis</i> 60% EE                | <b>0.25%-0.5%</b>  | 62%        | 67%        | 67% | ND | ND |
| <i>Scutellaria baicalensis</i> 90% EE                | <b>0.25%-0.5%</b>  | 72%        | 74%        | 75% | ND | ND |
| <i>Andrographis paniculata</i> 90% EE                | 0.5%-1%            | 74%        | 75%        | 75% | ND | ND |
| <i>Scutellaria baicalensis</i> 30% EE                | <b>0.25%-0.5%</b>  | 80%        | 72%        | 77% | ND | ND |
| <i>Cistus incanus</i>                                | 0.25%-0.05%        | <b>29%</b> | 74%        | 77% | ND | ND |
| <i>Andrographis paniculata</i> 30% EE                | 1%-2%              | 79%        | 78%        | 78% | ND | ND |
| Chuan Xin Lian                                       | >2%                | 89%        | 86%        | 85% | ND | ND |
| Citrosept™                                           | 1%-2%              | 89%        | 90%        | 85% | ND | ND |
| <i>Polygonum cospidatum</i> 30% EE <sup>d</sup>      | <b>0.25%-0.5%</b>  | <b>34%</b> | 65%        | 87% | ND | ND |
| Lauricidin™                                          | >2%                | 88%        | 86%        | 87% | ND | ND |
| <i>Scutellaria barbata</i>                           | >2%                | 58%        | 60%        | 88% | ND | ND |
| <i>Stevia rebaudiana</i> fol                         | >2%                | 86%        | 66%        | 88% | ND | ND |
| <i>Andrographis paniculata</i> 60% EE                | 1%-2%              | 76%        | 77%        | 88% | ND | ND |
| <i>Dipsacus fullonum</i> rad                         | >2%                | 84%        | 90%        | 89% | ND | ND |
| LL37 antimicrobial peptide                           | >2%                | 91%        | 91%        | 89% | ND | ND |
| <i>Uncaria tomentosa</i>                             | >2%                | 68%        | 90%        | 91% | ND | ND |
| <i>Ashwagandha somnifera</i> 90% EE                  | 0.5%-1%            | 76%        | 76%        | 92% | ND | ND |
| <i>Ashwagandha somnifera</i> 60% EE                  | 0.5%-1%            | 79%        | 81%        | 92% | ND | ND |
| Colloidal silver (Argentyn™)                         | >2%                | 88%        | 85%        | 92% | ND | ND |
| <i>Ashwagandha somnifera</i> 30% EE                  | 0.5%-1%            | 94%        | 94%        | 93% | ND | ND |
| Citrosept™                                           | 1%-2%              | 98%        | 99%        | 95% | ND | ND |
| Grapefruit seed extract                              | Citrus paradisi    | 78%        | 81%        | 94% | ND | ND |

<sup>a</sup> The standard microdilution method was used to determine the minimum inhibitory concentration (MIC). The MICs below 0.5% are shown in bold.

<sup>b</sup> A 7-day old *B. burgdorferi* stationary phase culture was treated with natural product extracts or control drugs for 7 days. Bold type indicates the samples that had better activity compared with doxycycline or cefuroxime controls. Residual viable *B. burgdorferi* was calculated according to the regression equation and ratios of Green/Red fluorescence obtained by SYBR Green I/PI assay.

<sup>c</sup> One of triplicate subculture samples grew up, and the other two samples did not grow back. Abbreviations: EE: ethanol extract; WE: water extract.

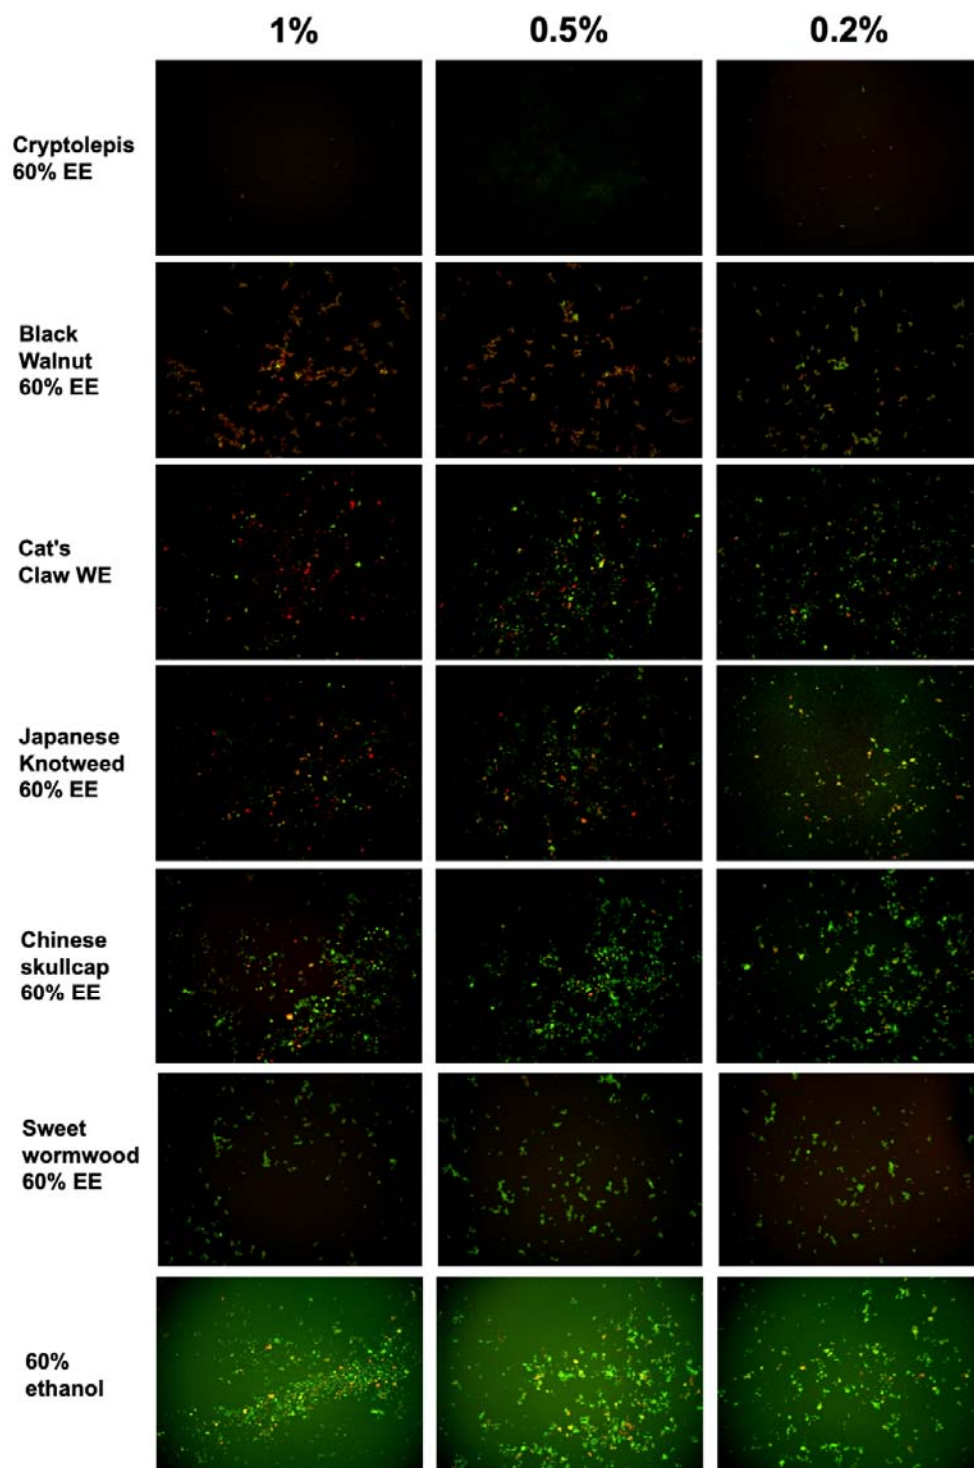

**Figure 1. Effect of natural product extracts on the viability of stationary phase *B. burgdorferi*.** A 7-day old *B. burgdorferi* stationary phase culture was treated with the natural product extracts at 1%, 0.5% and 0.2% for 7 days followed by staining with SYBR Green I/PI viability assay and fluorescence microscopy.



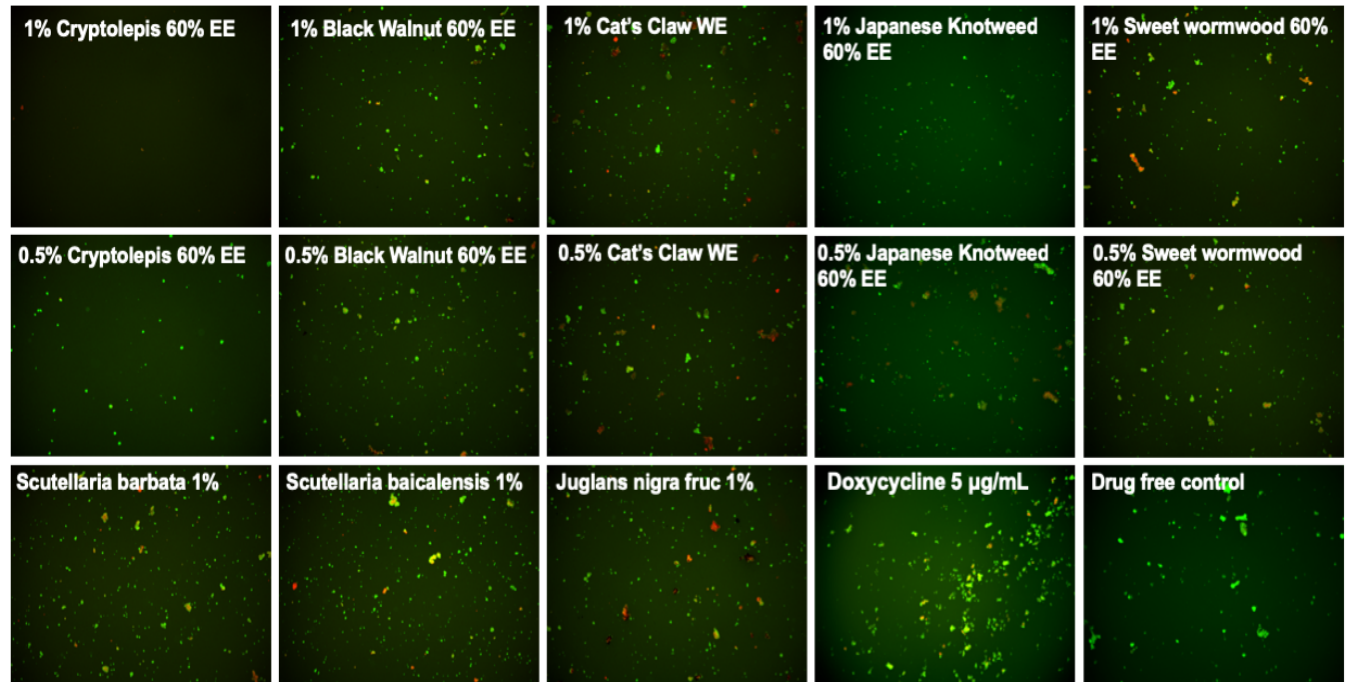

**Figure 2. Subculture of *Borrelia burgdorferi* after treatment with natural product extracts.** A 7-day stationary phase *B. burgdorferi* culture was treated with the indicated natural product extracts for 7 days followed by washing and resuspension in fresh BSK-H medium and subculture for 21 days. The viability of the subculture was examined by SYBR Green I/PI stain and fluorescence microscopy.

**Table 2: Botanical and natural medicine sources, validation, and testing**

| Natural Product           | Source                                                   | Validation/ID                                                                                                                                                       | Contamination                                                                                                                     | Details                                                                                              |
|---------------------------|----------------------------------------------------------|---------------------------------------------------------------------------------------------------------------------------------------------------------------------|-----------------------------------------------------------------------------------------------------------------------------------|------------------------------------------------------------------------------------------------------|
| <i>Citrus x paradisi</i>  | Cintamani, Poland (Citrosept™)                           | Cintamani, Poland                                                                                                                                                   | <1ppm for Benzalkonium chloride, Triclosan, Benzoic Acid                                                                          | Organic grapefruit seed extract                                                                      |
| <i>Stevia rebaudiana</i>  | Sonoma County Herb Exchange (Cultivated)                 | Organoleptic, KW Botanicals                                                                                                                                         | N/A                                                                                                                               | 25% ETOH extract by KW Botanicals                                                                    |
| <i>Juglans nigra</i>      | Pacific Botanicals (Wild harvested)                      | Organoleptic, KW Botanicals                                                                                                                                         | N/A                                                                                                                               | 45% ETOH extract of husk/hulls by KW Botanicals                                                      |
| <i>Dipsacus fullonum</i>  | Friend's of the Trees (wild harvested, Washington State) | DNA Species Identification, NSF International                                                                                                                       | N/A                                                                                                                               | 40% ETOH by KW Botanicals (Inadvertently co-mingled with <i>D. asper</i> sample prior to testing)    |
| <i>Dipsacus asper</i>     | KW Botanicals (Wild harvested, California)               | DNA Species Identification, NSF International                                                                                                                       | N/A                                                                                                                               | 40% ETOH by KW Botanicals (Inadvertently co-mingled with <i>D. fullonum</i> sample prior to testing) |
| <i>Uncaria tomentosa</i>  | Mountain Rose Herbs (Wild harvested)                     | DNA Species Identification, Christopher Hobbs, Ph.D.                                                                                                                | negative testing for aerobic plate count, e. coli, coliform, salmonella, yeast & mold                                             | 50% ETOH by KW Botanicals                                                                            |
| <i>Artemisia annua</i>    | Heron Botanicals (Organic cultivation)                   | American Herbal Pharmacopoeia (Scotts Valley, CA), Organoleptic, Heron Botanicals<br>Confirmed 0.11% Artemisinin content, The Institute for Food Safety and Defense | negative testing for aerobic plate count and yeast & mold                                                                         | 30, 60, 90% ETOH by Heron Botanicals                                                                 |
| <i>Withania somnifera</i> | Heron Botanicals (Organic cultivation)                   | HPTLC, The Institute for Food Safety and Defense<br>Organoleptic, Heron Botanicals                                                                                  | negative testing for Pb, Cd, Hg, As, aerobic plate count and yeast & mold                                                         | 30, 60, 90% ETOH by Heron Botanicals                                                                 |
| <i>Juglans nigra</i>      | Heron Botanicals (Wild harvested, New York)              | Organoleptic, Heron Botanicals                                                                                                                                      | positive aerobic plate count: 960 CFU/ml (acceptable limit 1,000 CFU/ml)<br>negative testing for Pb, Cd, Hg, As, and yeast & mold | 30, 60, 90% ETOH by Heron Botanicals                                                                 |

|                                  |                                                  |                                                                                    |                                                                                       |                                                                                                                                               |
|----------------------------------|--------------------------------------------------|------------------------------------------------------------------------------------|---------------------------------------------------------------------------------------|-----------------------------------------------------------------------------------------------------------------------------------------------|
| <i>Andrographis paniculata</i>   | Heron Botanicals<br>(Organic cultivation, China) | Organoleptic, Heron Botanicals                                                     | negative testing for pesticides, sulfur dioxide, aerobic plate count and yeast & mold | 30, 60, 90% ETOH by Heron Botanicals                                                                                                          |
| <i>Polygonum cuspidatum</i>      | Heron Botanicals<br>(Organic cultivation, China) | Organoleptic, Heron Botanicals                                                     | negative testing for pesticides, sulfur dioxide, aerobic plate count and yeast & mold | 30, 60, 90% ETOH by Heron Botanicals                                                                                                          |
| <i>Scutellaria baicalensis</i>   | Heron Botanicals<br>(Organic cultivation, China) | Organoleptic, Heron Botanicals                                                     | negative testing for pesticides, sulfur dioxide, aerobic plate count and yeast & mold | 30, 60, 90% ETOH by Heron Botanicals                                                                                                          |
| <i>Cryptolepis sanguinolenta</i> | Heron Botanicals<br>(Wild harvested, Ghana)      | HPTLC, The Institute for Food Safety and Defense<br>Organoleptic, Heron Botanicals | negative testing for Pb, Cd, Hg, As, aerobic plate count and yeast & mold             | 30, 60, 90% ETOH by Heron Botanicals                                                                                                          |
| <i>Cistus incanus</i>            | BioPure Healing Products™                        | DNA Species Identification, NSF International                                      | Negative testing for aerobic plate count, e. coli, coliforms and yeast & mold         | 45% ETOH by BioPure Healing Products (aerial parts). DNA analysis reports Cistus Incanus and Cistus albidus are genetically indistinguishable |
| Monolaurin                       | Lauricidin™                                      |                                                                                    | N/A                                                                                   |                                                                                                                                               |
| Colloidal silver                 | Argentyn 23™                                     |                                                                                    |                                                                                       |                                                                                                                                               |

## References

1. Stanek G, Reiter M. The expanding Lyme Borrelia complex--clinical significance of genomic species? *Clinical microbiology and infection : the official publication of the European Society of Clinical Microbiology and Infectious Diseases*. 2011;17(4):487-93.
2. Long KC, Cohn KA. Lyme Arthritis: An Update for Clinical Practice. *Pediatric emergency care*. 2018;34(8):588-91.
3. Hinckley AF, Connally NP, Meek JI, Johnson BJ, Kemperman MM, Feldman KA, et al. Lyme disease testing by large commercial laboratories in the United States. *Clinical infectious diseases : an official publication of the Infectious Diseases Society of America*. 2014;59(5):676-81.
4. CDC. Lyme Disease. 2017 [Available from: <http://www.cdc.gov/lyme/>].
5. Lieske DJ, Lloyd VK. Combining public participatory surveillance and occupancy modelling to predict the distributional response of *Ixodes scapularis* to climate change. *Ticks and tick-borne diseases*. 2018;9(3):695-706.
6. Stone BL, Tourand Y, Brisette CA. Brave New Worlds: The Expanding Universe of Lyme Disease. *Vector borne and zoonotic diseases*. 2017;17(9):619-29.
7. Baylis M. Potential impact of climate change on emerging vector-borne and other infections in the UK. *Environmental health : a global access science source*. 2017;16(Suppl 1):112.
8. Ostfeld RS, Levi T, Keesing F, Oggenfuss K, Canham CD. Tick-borne disease risk in a forest food web. *Ecology*. 2018;99(7):1562-73.
9. Nieto NC, Porter WT, Wachara JC, Lowrey TJ, Martin L, Motyka PJ, et al. Using citizen science to describe the prevalence and distribution of tick bite and exposure to tick-borne diseases in the United States. *PLoS One*. 2018;13(7):e0199644.
10. Salkeld DJ, Nieto NC, Carbajales-Dale P, Carbajales-Dale M, Cinkovich SS, Lambin EF. Disease Risk & Landscape Attributes of Tick-Borne Borrelia Pathogens in the San Francisco Bay Area, California. *PLoS One*. 2015;10(8):e0134812.
11. Steere AC, Strle F, Wormser GP, Hu LT, Branda JA, Hovius JW, et al. Lyme borreliosis. *Nature reviews Disease primers*. 2016;2:16090.
12. Aucott JN. Posttreatment Lyme disease syndrome. *Infect Dis Clin North Am*. 2015;29(2):309-23.
13. Marques A. Chronic Lyme disease: a review. *Infect Dis Clin North Am*. 2008;22(2):341-60, vii-viii.
14. CDC. Post-Treatment Lyme Disease Syndrome. 2017 [Available from: <http://www.cdc.gov/lyme/postLDS/index.html>].
15. Adrion ER, Aucott J, Lemke KW, Weiner JP. Health care costs, utilization and patterns of care following Lyme disease. *PLoS One*. 2015;10(2):e0116767.
16. Johnson L, Aylward A, Stricker RB. Healthcare access and burden of care for patients with Lyme disease: a large United States survey. *Health Policy*. 2011;102(1):64-71.
17. van den Wijngaard CC, Hofhuis A, Harms MG, Haagsma JA, Wong A, de Wit GA, et al. The burden of Lyme borreliosis expressed in disability-adjusted life years. *European journal of public health*. 2015;25(6):1071-8.
18. Bernard Q, Smith AA, Yang X, Koci J, Foor SD, Cramer SD, et al. Plasticity in early immune evasion strategies of a bacterial pathogen. *Proc Natl Acad Sci U S A*. 2018;115(16):E3788-E97.
19. Tracy KE, Baumgarth N. *Borrelia burgdorferi* Manipulates Innate and Adaptive Immunity to Establish Persistence in Rodent Reservoir Hosts. *Frontiers in immunology*. 2017;8:116.
20. Hodzic E, Imai D, Feng S, Barthold SW. Resurgence of Persisting Non-Cultivable *Borrelia burgdorferi* following Antibiotic Treatment in Mice. *PLoS One*. 2014;9(1):e86907.
21. Straubinger RK, Summers BA, Chang YF, Appel MJ. Persistence of *Borrelia burgdorferi* in experimentally infected dogs after antibiotic treatment. *J Clin Microbiol*. 1997;35(1):111-6.

22. Embers ME, Hasenkampf NR, Jacobs MB, Tardo AC, Doyle-Meyers LA, Philipp MT, et al. Variable manifestations, diverse seroreactivity and post-treatment persistence in non-human primates exposed to *Borrelia burgdorferi* by tick feeding. *PLoS One*. 2017;12(12):e0189071.
23. Barthold SW, Hodzic E, Imai DM, Feng S, Yang X, Luft BJ. Ineffectiveness of tigecycline against persistent *Borrelia burgdorferi*. *Antimicrob Agents Chemother*. 2010;54(2):643-51.
24. Middelveen MJ, Sapi E, Burke J, Filush KR, Franco A, Fesler MC, et al. Persistent *Borrelia* Infection in Patients with Ongoing Symptoms of Lyme Disease. *Healthcare (Basel)*. 2018;6(2).
25. Marques A, Telford SR, 3rd, Turk SP, Chung E, Williams C, Dardick K, et al. Xenodiagnosis to Detect *Borrelia burgdorferi* Infection: A First-in-Human Study. *Clinical infectious diseases : an official publication of the Infectious Diseases Society of America*. 2014;58(7):937-45.
26. Oksi J, Marjamaki M, Nikoskelainen J, Viljanen MK. *Borrelia burgdorferi* detected by culture and PCR in clinical relapse of disseminated Lyme borreliosis. *Annals of medicine*. 1999;31(3):225-32.
27. Hudson BJ, Stewart M, Lennox VA, Fukunaga M, Yabuki M, Macorison H, et al. Culture-positive Lyme borreliosis. *The Medical journal of Australia*. 1998;168(10):500-2.
28. Johnson L, Wilcox S, Mankoff J, Stricker RB. Severity of chronic Lyme disease compared to other chronic conditions: a quality of life survey. *PeerJ*. 2014;2:e322.
29. Rebman AW, Bechtold KT, Yang T, Mihm EA, Soloski MJ, Novak CB, et al. The Clinical, Symptom, and Quality-of-Life Characterization of a Well-Defined Group of Patients with Posttreatment Lyme Disease Syndrome. *Frontiers in medicine*. 2017;4:224.
30. Wormser GP, Dattwyler RJ, Shapiro ED, Halperin JJ, Steere AC, Klempner MS, et al. The clinical assessment, treatment, and prevention of Lyme disease, human granulocytic anaplasmosis, and babesiosis: clinical practice guidelines by the Infectious Diseases Society of America. *Clinical infectious diseases : an official publication of the Infectious Diseases Society of America*. 2006;43(9):1089-134.
31. Cameron DJ, Johnson LB, Maloney EL. Evidence assessments and guideline recommendations in Lyme disease: the clinical management of known tick bites, erythema migrans rashes and persistent disease. *Expert review of anti-infective therapy*. 2014;12(9):1103-35.
32. DeLong AK, Blossom B, Maloney E, Phillips SE. Potential benefits of retreatment highlight the need for additional Lyme disease research. *Am J Med*. 2014;127(2):e9-e10.
33. Feng J, Auwaerter PG, Zhang Y. Drug Combinations against *Borrelia burgdorferi* Persists In Vitro: Eradication Achieved by Using Daptomycin, Cefoperazone and Doxycycline. *PLoS One*. 2015;10(3):e0117207.
34. Feng J, Li T, Yee R, Yuan Y, Bai C, Cai M, et al. Stationary phase persister/biofilm microcolony of *Borrelia burgdorferi* causes more severe disease in a mouse model of Lyme arthritis: implications for understanding persistence, Post-treatment Lyme Disease Syndrome (PTLDS), and treatment failure. *Discov Med*. 2019;27(148):125-38.
35. Feng J, Wang T, Shi W, Zhang S, Sullivan D, Auwaerter PG, et al. Identification of Novel Activity against *Borrelia burgdorferi* Persists Using an FDA Approved Drug Library. *Emerg Microb Infect*. 2014;July 2, 2014;3, e49; doi:10.1038/emi.2014.53.
36. Feng J, Shi W, Zhang S, Sullivan D, Auwaerter PG, Zhang Y. A Drug Combination Screen Identifies Drugs Active against Amoxicillin-Induced Round Bodies of In Vitro *Borrelia burgdorferi* Persists from an FDA Drug Library. *Front Microbiol*. 2016;7:743.
37. Feng J, Zhang S, Shi W, Zhang Y. Activity of Sulfa Drugs and Their Combinations against Stationary Phase *B. burgdorferi* In Vitro. *Antibiotics (Basel, Switzerland)*. 2017;6(1).
38. Steenbergen JN, Alder J, Thorne GM, Tally FP. Daptomycin: a lipopeptide antibiotic for the treatment of serious Gram-positive infections. *J Antimicrob Chemother*. 2005;55(3):283-8.
39. Zhang Y, Yew WW, Barer MR. Targeting persisters for tuberculosis control. *Antimicrob Agents Chemother*. 2012;56(5):2223-30.

40. Deng S. Preliminary study on the prevention and treatment of leptospirosis with traditional Chinese medicine. *Liaoning Journal of Traditional Chinese Medicine*. 1985;9(5):15-7.
41. Deng S, Sheng R. Treatment of leptospirosis with Qixian Drink. *Zhejiang Journal of Traditional Chinese Medicine*. 1991;26(7):293-4.
42. Widhawati R, Hanani E, Zaini J. *Andrographis Paniculata* (Burm. F.) Nees Induces Clinical and Sputum Conversion in Pulmonary Tuberculosis Patients. *Medicine Science | International Medical Journal*. 2015;4(1):1.
43. Borchardt JK. The Beginnings of Drug Therapy: Ancient Mesopotamian Medicine. *Drug News Perspect*. 2002;15(3):187-92.
44. Borchardt JK. Beginnings of drug therapy: drug therapy in ancient India. *Drug News Perspect*. 2003;16(6):403-8.
45. Lude S, Vecchio S, Sinno-Tellier S, Dopter A, Mustonen H, Vucinic S, et al. Adverse Effects of Plant Food Supplements and Plants Consumed as Food: Results from the Poisons Centres-Based PlantLIBRA Study. *Phytotherapy research : PTR*. 2016;30(6):988-96.
46. Garcia-Alvarez A, Mila-Villaruel R, Ribas-Barba L, Egan B, Badea M, Maggi FM, et al. Usage of Plant Food Supplements (PFS) for weight control in six European countries: results from the PlantLIBRA PFS Consumer Survey 2011-2012. *BMC complementary and alternative medicine*. 2016;16:254.
47. Di Lorenzo C, Ceschi A, Kupferschmidt H, Lude S, De Souza Nascimento E, Dos Santos A, et al. Adverse effects of plant food supplements and botanical preparations: a systematic review with critical evaluation of causality. *Br J Clin Pharmacol*. 2015;79(4):578-92.
48. Feng J, Shi W, Miklossy J, Tauxe GM, McMenemy CJ, Zhang Y. Identification of Essential Oils with Strong Activity against Stationary Phase *Borrelia burgdorferi*. *Antibiotics (Basel, Switzerland)*. 2018;7(4).
49. Feng J, Zhang S, Shi W, Zubcevic N, Miklossy J, Zhang Y. Selective Essential Oils from Spice or Culinary Herbs Have High Activity against Stationary Phase and Biofilm *Borrelia burgdorferi*. *Frontiers in medicine*. 2017;4:169.
50. Theophilus PA, Victoria MJ, Socarras KM, Filush KR, Gupta K, Luecke DF, et al. Effectiveness of *Stevia Rebaudiana* Whole Leaf Extract Against the Various Morphological Forms of *Borrelia Burgdorferi* in Vitro. *European journal of microbiology & immunology*. 2015;5(4):268-80.
51. Osafo N, Mensah KB, Yeboah OK. Phytochemical and Pharmacological Review of *Cryptolepis sanguinolenta* (Lindl.) Schlechter. *Adv Pharmacol Sci*. 2017;2017:3026370.
52. Olajide OA, Bhatia HS, de Oliveira AC, Wright CW, Fiebich BL. Anti-neuroinflammatory properties of synthetic cryptolepine in human neuroblastoma cells: possible involvement of NF-kappaB and p38 MAPK inhibition. *Eur J Med Chem*. 2013;63:333-9.
53. Hanprasertpong N, Teekachunhatean S, Chaiwongsa R, Ongchai S, Kunanusorn P, Sangdee C, et al. Analgesic, anti-inflammatory, and chondroprotective activities of *Cryptolepis buchanani* extract: in vitro and in vivo studies. *BioMed research international*. 2014;2014:978582.
54. Boakye-Yiadom K, Heman-Ackah SM. Cryptolepine hydrochloride effect on *Staphylococcus aureus*. *Journal of pharmaceutical sciences*. 1979;68(12):1510-4.
55. Silva O, Duarte A, Cabrita J, Pimentel M, Diniz A, Gomes E. Antimicrobial activity of Guinea-Bissau traditional remedies. *J Ethnopharmacol*. 1996;50(1):55-9.
56. Paulo A, Duarte A, Gomes ET. In vitro antibacterial screening of *Cryptolepis sanguinolenta* alkaloids. *J Ethnopharmacol*. 1994;44(2):127-30.
57. Mills-Robertson FC, Tay SC, Duker-Eshun G, Walana W, Badu K. In vitro antimicrobial activity of ethanolic fractions of *Cryptolepis sanguinolenta*. *Ann Clin Microbiol Antimicrob*. 2012;11:16.
58. Cimanga K, De Bruyne T, Lasure A, Van Poel B, Pieters L, Claeys M, et al. In vitro biological activities of alkaloids from *Cryptolepis sanguinolenta*. *Planta Med*. 1996;62(1):22-7.

59. Cimanga K, De Bruyne T, Pieters L, Totte J, Tona L, Kambu K, et al. Antibacterial and antifungal activities of neocryptolepine, biscryptolepine and cryptoquindoline, alkaloids isolated from *Cryptolepis sanguinolenta*. *Phytomedicine*. 1998;5(3):209-14.
60. Sawyer IK, Berry MI, Brown MW, Ford JL. The effect of cryptolepine on the morphology and survival of *Escherichia coli*, *Candida albicans* and *Saccharomyces cerevisiae*. *J Appl Bacteriol*. 1995;79(3):314-21.
61. Tona L, Kambu K, Ngimbi N, Cimanga K, Vlietinck AJ. Antiamoebic and phytochemical screening of some Congolese medicinal plants. *J Ethnopharmacol*. 1998;61(1):57-65.
62. Cimanga K, De Bruyne T, Pieters L, Vlietinck AJ, Turger CA. In vitro and in vivo antiplasmodial activity of cryptolepine and related alkaloids from *Cryptolepis sanguinolenta*. *J Nat Prod*. 1997;60(7):688-91.
63. Paulo A, Gomes ET, Steele J, Warhurst DC, Houghton PJ. Antiplasmodial activity of *Cryptolepis sanguinolenta* alkaloids from leaves and roots. *Planta Med*. 2000;66(1):30-4.
64. Onyeibor O, Croft SL, Dodson HI, Feiz-Haddad M, Kendrick H, Millington NJ, et al. Synthesis of some cryptolepine analogues, assessment of their antimalarial and cytotoxic activities, and consideration of their antimalarial mode of action. *J Med Chem*. 2005;48(7):2701-9.
65. Forkuo AD, Ansah C, Mensah KB, Annan K, Gyan B, Theron A, et al. In vitro anti-malarial interaction and gametocytocidal activity of cryptolepine. *Malar J*. 2017;16(1):496.
66. Bugyei KA, Boye GL, Addy ME. Clinical efficacy of a tea-bag formulation of *cryptolepis sanguinolenta* root in the treatment of acute uncomplicated falciparum malaria. *Ghana Med J*. 2010;44(1):3-9.
67. Boye G, editor *Studies on antimalarial action of Cryptolepis sanguinolenta extract*. International Symposium on East-West Medicine; Seoul, Korea; 1989.
68. Sawyer I, Berry M, Ford J. The killing effect of cryptolepine on *Staphylococcus aureus*. *Letters in applied microbiology*. 2005;40(1):24-9.
69. Ansah C, Khan A, Gooderham NJ. In vitro genotoxicity of the West African anti-malarial herbal *Cryptolepis sanguinolenta* and its major alkaloid cryptolepine. *Toxicology*. 2005;208(1):141-7.
70. Ansah C, Gooderham NJ. The popular herbal antimalarial, extract of *Cryptolepis sanguinolenta*, is potently cytotoxic. *Toxicological sciences*. 2002;70(2):245-51.
71. Bonjean K, De Pauw-Gillet M, Defresne M-P, Colson P, Houssier C, Dassonneville L, et al. The DNA intercalating alkaloid cryptolepine interferes with topoisomerase II and inhibits primarily DNA synthesis in B16 melanoma cells. *Biochemistry*. 1998;37(15):5136-46.
72. Lisgarten JN, Coll M, Portugal J, Wright CW, Aymami J. The antimalarial and cytotoxic drug cryptolepine intercalates into DNA at cytosine-cytosine sites. *Nature Structural & Molecular Biology*. 2002;9(1):57.
73. Guittat L, Alberti P, Rosu F, Van Miert S, Thetiot E, Pieters L, et al. Interactions of cryptolepine and neocryptolepine with unusual DNA structures. *Biochimie*. 2003;85(5):535-47.
74. Haldar K, Bhattacharjee S, Safeukui I. Drug resistance in *Plasmodium*. *Nature Reviews Microbiology*. 2018;16(3):156.
75. WHO. Status report on artemisinin resistance and ACT efficacy. August 2018 ed2018.
76. Munyangi J, Cornet-Vernet L, Idumbo M, Lu C, Lutgen P, Perronne C, et al. *Artemisia annua* and *Artemisia afra* tea infusions vs. artesunate-amodiaquine (ASAQ) in treating *Plasmodium falciparum* malaria in a large scale, double blind, randomized clinical trial. *Phytomedicine*. 2019;57:49-56.
77. Chougouo R, editor *Comparative study of the quality and efficiency of Artemisia annua grown in Cameroun*. MIM conference, Kenya; 2009.
78. Ansah C, Otsyina H, Duwiewua M, Woode E, Aboagye F, Aning K. Toxicological assessment of *Cryptolepis sanguinolenta* for possible use in veterinary medicine. *Journal of Veterinary Medicine and Animal Health*. 2009;1(1):11-016.

79. Ansah C, Mfoafo E, Woode E, Opoku-Okrah C, Owiredu W, Duwiejua M. Toxicological evaluation of the anti-malarial herb *Cryptolepis sanguinolenta* in rodents. *J Pharmacol Toxicol.* 2008;5:335-43.
80. Ajayi AF, Akhigbe RE. Antifertility activity of *Cryptolepis sanguinolenta* leaf ethanolic extract in male rats. *J Hum Reprod Sci.* 2012;5(1):43-7.
81. Buhner SH. *Healing Lyme: Natural Healing of Lyme Borreliosis and the Coinfections Chlamydia and Spotted Fever Rickettsiosis.* 2nd Edition ed: Raven Press; 2015 December 7, 2015.
82. Bi D, Zhao Y, Jiang R, Wang Y, Tian Y, Chen X, et al. Phytochemistry, Bioactivity and Potential Impact on Health of Juglans: the Original Plant of Walnut. *Nat Prod Commun.* 2016;11(6):869-80.
83. Owumi SE, Odunola OA, Gbadegesin MA, Nulah KL. Protective effect of *Juglans nigra* on sodium arsenite-induced toxicity in rats. *Pharmacognosy Res.* 2013;5(3):183-8.
84. Ahmad T, Suzuki YJ. Juglone in Oxidative Stress and Cell Signaling. *Antioxidants (Basel).* 2019;8(4).
85. Goc A, Rath M. The anti-borreliae efficacy of phytochemicals and micronutrients: an update. *Therapeutic advances in infectious disease.* 2016;3(3-4):75-82.
86. Karvonen K, Gilbert L. Effective killing of *Borrelia burgdorferi* in vitro with novel herbal compounds. *General Medicine Open.* 2018;2(6).
87. Vu DC, Vo PH, Coggeshall MV, Lin CH. Identification and Characterization of Phenolic Compounds in Black Walnut Kernels. *J Agric Food Chem.* 2018;66(17):4503-11.
88. Ozcelik B, Kartal M, Orhan I. Cytotoxicity, antiviral and antimicrobial activities of alkaloids, flavonoids, and phenolic acids. *Pharm Biol.* 2011;49(4):396-402.
89. Nakayama M, Shimatani K, Ozawa T, Shigemune N, Tomiyama D, Yui K, et al. Mechanism for the antibacterial action of epigallocatechin gallate (EGCg) on *Bacillus subtilis*. *Biosci Biotechnol Biochem.* 2015;79(5):845-54.
90. Ho K-V, Lei Z, Sumner L, Coggeshall M, Hsieh H-Y, Stewart G, et al. Identifying Antibacterial Compounds in Black Walnuts (*Juglans nigra*) Using a Metabolomics Approach. *Metabolites.* 2018;8(4):58.
91. Amarowicz R, Dykes GA, Pegg RB. Antibacterial activity of tannin constituents from *Phaseolus vulgaris*, *Fagopyrum esculentum*, *Corylus avellana* and *Juglans nigra*. *Fitoterapia.* 2008;79(3):217-9.
92. Zmantar T, Miladi H, Kouidhi B, Chaabouni Y, Slama RB, Bakhrouf A, et al. Use of juglone as antibacterial and potential efflux pump inhibitors in *Staphylococcus aureus* isolated from the oral cavity. *Microbial pathogenesis.* 2016;101:44-9.
93. Oliveira I, Sousa A, Ferreira IC, Bento A, Estevinho L, Pereira JA. Total phenols, antioxidant potential and antimicrobial activity of walnut (*Juglans regia* L.) green husks. *Food and chemical toxicology : an international journal published for the British Industrial Biological Research Association.* 2008;46(7):2326-31.
94. Siegel JM. Dermatitis due to black walnut juice. *AMA archives of dermatology and syphilology.* 1954;70(4):511-3.
95. Mendonca C, Madan V, Austin S, Beck MH. Occupational contact urticaria from walnut associated with hand eczema. *Contact Dermatitis.* 2005;53(3):173-4.
96. Riggs LM, Franck T, Moore JN, Krunkosky TM, Hurley DJ, Peroni JF, et al. Neutrophil myeloperoxidase measurements in plasma, lamina propria, and skin of horses given black walnut extract. *American journal of veterinary research.* 2007;68(1):81-6.
97. Bonamonte D, Foti C, Angelini G. Hyperpigmentation and contact dermatitis due to *Juglans regia*. *Contact dermatitis.* 2001;44(2):102-3.
98. Neri I, Bianchi F, Giacomini F, Patrizi A. Acute irritant contact dermatitis due to *Juglans regia*. *Contact dermatitis.* 2006;55(1):62-3.
99. Aithal BK, Sunil Kumar MR, Rao BN, Upadhyay R, Prabhu V, Shavi G, et al. Evaluation of pharmacokinetic, biodistribution, pharmacodynamic, and toxicity profile of free juglone and its sterically stabilized liposomes. *Journal of pharmaceutical sciences.* 2011;100(8):3517-28.



100. Wu X, Li Q, Feng Y, Ji Q. Antitumor Research of the Active Ingredients from Traditional Chinese Medical Plant *Polygonum Cuspidatum*. *Evid Based Complement Alternat Med*. 2018;2018:2313021.
101. Zhang H, Li C, Kwok ST, Zhang QW, Chan SW. A Review of the Pharmacological Effects of the Dried Root of *Polygonum cuspidatum* (Hu Zhang) and Its Constituents. *Evid Based Complement Alternat Med*. 2013;2013:208349.
102. Breuss JM, Atanasov AG, Uhrin P. Resveratrol and Its Effects on the Vascular System. *Int J Mol Sci*. 2019;20(7).
103. Abdelgawad IY, Grant MKO, Zordoky BN. Leveraging the Cardio-Protective and Anticancer Properties of Resveratrol in Cardio-Oncology. *Nutrients*. 2019;11(3).
104. Vestergaard M, Ingmer H. Antibacterial and antifungal properties of resveratrol. *Int J Antimicrob Agents*. 2019.
105. Feng J, Shi W, Zhang S, Zhang Y. Identification of new compounds with high activity against stationary phase *Borrelia burgdorferi* from the NCI compound collection. *Emerg Microbes Infect*. 2015;4:e31.
106. Kim JR, Oh DR, Cha MH, Pyo BS, Rhee JH, Choy HE, et al. Protective effect of *polygoni cuspidati* radix and emodin on *Vibrio vulnificus* cytotoxicity and infection. *J Microbiol*. 2008;46(6):737-43.
107. Song JH, Kim SK, Chang KW, Han SK, Yi HK, Jeon JG. In vitro inhibitory effects of *Polygonum cuspidatum* on bacterial viability and virulence factors of *Streptococcus mutans* and *Streptococcus sobrinus*. *Arch Oral Biol*. 2006;51(12):1131-40.
108. Pandit S, Kim HJ, Park SH, Jeon JG. Enhancement of fluoride activity against *Streptococcus mutans* biofilms by a substance separated from *Polygonum cuspidatum*. *Biofouling*. 2012;28(3):279-87.
109. Shan B, Cai Y-Z, Brooks JD, Corke H. Antibacterial properties of *Polygonum cuspidatum* roots and their major bioactive constituents. *Food Chemistry*. 2008;109(3):530-7.
110. la Porte C, Voduc N, Zhang G, Seguin I, Tardiff D, Singhal N, et al. Steady-State Pharmacokinetics and Tolerability of Trans-Resveratrol 2000mg Twice Daily with Food, Quercetin and Alcohol (Ethanol) in Healthy Human Subjects. *Clinical Pharmacokinetics*. 2010;49(7):449-54.
111. Cottart CH, Nivet-Antoine V, Beaudoux JL. Review of recent data on the metabolism, biological effects, and toxicity of resveratrol in humans. *Molecular nutrition & food research*. 2014;58(1):7-21.
112. Williams LD, Burdock GA, Edwards JA, Beck M, Bausch J. Safety studies conducted on high-purity trans-resveratrol in experimental animals. *Food and chemical toxicology : an international journal published for the British Industrial Biological Research Association*. 2009;47(9):2170-82.
113. Cottart CH, Nivet-Antoine V, Laguillier-Morizot C, Beaudoux JL. Resveratrol bioavailability and toxicity in humans. *Molecular nutrition & food research*. 2010;54(1):7-16.
114. Fu J, Wu S, Wang M, Tian Y, Zhang Z, Song R. Intestinal metabolism of *Polygonum cuspidatum* in vitro and in vivo. *Biomed Chromatogr*. 2018;32(6):e4190.
115. WHO. WHO monograph on good agricultural and collection practices (GACP) for *Artemisia annua* L. 2006.
116. Liu W, Liu Y. Youyou Tu: significance of winning the 2015 Nobel Prize in Physiology or Medicine. *Cardiovasc Diagn Ther*. 2016;6(1):1-2.
117. Woerdenbag HJ, Lugt CB, Pras N. *Artemisia annua* L.: a source of novel antimalarial drugs. *Pharm Weekbl Sci*. 1990;12(5):169-81.
118. Hsu E. Reflections on the 'discovery' of the antimalarial qinghao. *Br J Clin Pharmacol*. 2006;61(6):666-70.
119. Feng J, Weitner M, Shi W, Zhang S, Sullivan D, Zhang Y. Identification of Additional Anti-Persister Activity against *Borrelia burgdorferi* from an FDA Drug Library. *Antibiotics*. 2015;4(3):397.
120. Puri BK, Hakkarainen-Smith JS, Monro JA. The effect of artesunate on short-term memory in Lyme borreliosis. *Med Hypotheses*. 2017;105:4-5.

121. O'Neill PM, Barton VE, Ward SA. The Molecular Mechanism of Action of Artemisinin—The Debate Continues. *Molecules*. 2010;15(3):1705-21.
122. Eckstein-Ludwig U, Webb RJ, Van Goethem ID, East JM, Lee AG, Kimura M, et al. Artemisinins target the SERCA of *Plasmodium falciparum*. *Nature*. 2003;424(6951):957-61.
123. Wang J, Zhang CJ, Chia WN, Loh CC, Li Z, Lee YM, et al. Haem-activated promiscuous targeting of artemisinin in *Plasmodium falciparum*. *Nat Commun*. 2015;6:10111.
124. Krebs S, Omer B, Omer TN, Fliser D. Wormwood (*Artemisia absinthium*) for poorly responsive early-stage IgA nephropathy: a pilot uncontrolled trial. *Am J Kidney Dis*. 2010;56(6):1095-9.
125. Muto T, Watanabe T, Okamura M, Moto M, Kashida Y, Mitsumori K. Thirteen-week repeated dose toxicity study of wormwood (*Artemisia absinthium*) extract in rats. *J Toxicol Sci*. 2003;28(5):471-8.
126. Mueller MS, Karhagomba IB, Hirt HM, Wemakor E. The potential of *Artemisia annua* L. as a locally produced remedy for malaria in the tropics: agricultural, chemical and clinical aspects. *Journal of Ethnopharmacology*. 2000;73(3):487-93.
127. Buhner SH. *Herbal Antibiotics: Natural Alternatives for Treating Drug-resistant Bacteria*. 2nd Edition ed: Storey Publishing; 2012.
128. Liang W, Huang X, Chen W. The Effects of Baicalin and Baicalein on Cerebral Ischemia: A Review. *Aging Dis*. 2017;8(6):850-67.
129. Cheng CS, Chen J, Tan HY, Wang N, Chen Z, Feng Y. *Scutellaria baicalensis* and Cancer Treatment: Recent Progress and Perspectives in Biomedical and Clinical Studies. *Am J Chin Med*. 2018;46(1):25-54.
130. Sowndhararajan K, Deepa P, Kim M, Park SJ, Kim S. Neuroprotective and Cognitive Enhancement Potentials of Baicalin: A Review. *Brain Sci*. 2018;8(6).
131. Dinda B, Dinda S, DasSharma S, Banik R, Chakraborty A, Dinda M. Therapeutic potentials of baicalin and its aglycone, baicalein against inflammatory disorders. *Eur J Med Chem*. 2017;131:68-80.
132. Goc A, Niedzwiecki A, Rath M. In vitro evaluation of antibacterial activity of phytochemicals and micronutrients against *Borrelia burgdorferi* and *Borrelia garinii*. *Journal of applied microbiology*. 2015;119(6):1561-72.
133. Zhao Q, Chen XY, Martin C. *Scutellaria baicalensis*, the golden herb from the garden of Chinese medicinal plants. *Sci Bull (Beijing)*. 2016;61(18):1391-8.
134. Ming J, Zhuoneng L, Guangxun Z. Protective role of flavonoid baicalin from *Scutellaria baicalensis* in periodontal disease pathogenesis: A literature review. *Complement Ther Med*. 2018;38:11-8.
135. Cai W, Fu Y, Zhang W, Chen X, Zhao J, Song W, et al. Synergistic effects of baicalein with cefotaxime against *Klebsiella pneumoniae* through inhibiting CTX-M-1 gene expression. *BMC Microbiology*. 2016;16(1):181.
136. Qian M, Tang S, Wu C, Wang Y, He T, Chen T, et al. Synergy between baicalein and penicillins against penicillinase-producing *Staphylococcus aureus*. *International Journal of Medical Microbiology*. 2015;305(6):501-4.
137. Fujita M, Shiota S, Kuroda T, Hatano T, Yoshida T, Mizushima T, et al. Remarkable Synergies between Baicalein and Tetracycline, and Baicalein and  $\beta$ -Lactams against Methicillin-Resistant *Staphylococcus aureus*. *Microbiology and Immunology*. 2005;49(4):391-6.
138. Jang EJ, Cha SM, Choi SM, Cha JD. Combination effects of baicalein with antibiotics against oral pathogens. *Arch Oral Biol*. 2014;59(11):1233-41.
139. Wang J, Qiao M, Zhou Y, Du H, Bai J, Yuan W, et al. In vitro synergistic effect of baicalin with azithromycin against *Staphylococcus saprophyticus* isolated from francolins with ophthalmia. *Poult Sci*. 2019;98(1):373-80.
140. Luo J, Dong B, Wang K, Cai S, Liu T, Cheng X, et al. Baicalin inhibits biofilm formation, attenuates the quorum sensing-controlled virulence and enhances *Pseudomonas aeruginosa* clearance in a mouse peritoneal implant infection model. *PLoS One*. 2017;12(4):e0176883.

141. Luo J, Kong J-L, Dong B-Y, Huang H, Wang K, Wu L-H, et al. Baicalein attenuates the quorum sensing-controlled virulence factors of *Pseudomonas aeruginosa* and relieves the inflammatory response in *P. aeruginosa*-infected macrophages by downregulating the MAPK and NFκB signal-transduction pathways. *Drug design, development and therapy*. 2016;10:183-203.
142. Smol'ianinov ES, Gol'dberg VE, Matiash MG, Ryzhakov VM, Boldyshev DA, Litvinenko VI, et al. [Effect of *Scutellaria baicalensis* extract on the immunologic status of patients with lung cancer receiving antineoplastic chemotherapy]. *Eksp Klin Farmakol*. 1997;60(6):49-51.
143. Gol'dberg V, Ryzhakov V, Matiash M, Stepovaia E, Boldyshev D, Litvinenko V, et al. Dry extract of *Scutellaria baicalensis* as a hemostimulant in antineoplastic chemotherapy in patients with lung cancer. *Eksperimental'naia i klinicheskaia farmakologija*. 1997;60(6):28-30.
144. Zhang H, Huang J. [Preliminary study of traditional Chinese medicine treatment of minimal brain dysfunction: analysis of 100 cases]. *Zhong Xi Yi Jie He Za Zhi*. 1990;10(5):278-9, 60.
145. Hui KM, Wang XH, Xue H. Interaction of flavones from the roots of *Scutellaria baicalensis* with the benzodiazepine site. *Planta Med*. 2000;66(1):91-3.
146. Liao JF, Wang HH, Chen MC, Chen CC, Chen CF. Benzodiazepine binding site-interactive flavones from *Scutellaria baicalensis* root. *Planta Med*. 1998;64(6):571-2.
147. Chang HH, Yi PL, Cheng CH, Lu CY, Hsiao YT, Tsai YF, et al. Biphasic effects of baicalin, an active constituent of *Scutellaria baicalensis* Georgi, in the spontaneous sleep-wake regulation. *J Ethnopharmacol*. 2011;135(2):359-68.
148. Chalasani N, Vuppalanchi R, Navarro V, Fontana R, Bonkovsky H, Barnhart H, et al. Acute liver injury due to flavocoxid (Limbrel), a medical food for osteoarthritis: a case series. *Annals of internal medicine*. 2012;156(12):857-W300.
149. Reichenbach S, Jüni P. Medical Food and Food Supplements: Not Always as Safe as Generally Assumed. *Annals of Internal Medicine*. 2012;156(12):894-5.
150. Yimam M, Zhao Y, Ma W, Jia Q, Do SG, Shin JH. 90-day oral toxicity study of UP446, a combination of defined extracts of *Scutellaria baicalensis* and *Acacia catechu*, in rats. *Food and chemical toxicology : an international journal published for the British Industrial Biological Research Association*. 2010;48(5):1202-9.
151. Tian XY, Cheung LM, Leung K, Qi C, Deng B, Deng PX, et al. The effects of *Scutellaria baicalensis* extract on embryonic development in mice. *Birth Defects Res B Dev Reprod Toxicol*. 2009;86(2):79-84.
152. Snow AD, Castillo GM, Nguyen BP, Choi PY, Cummings JA, Cam J, et al. The Amazon rain forest plant *Uncaria tomentosa* (cat's claw) and its specific proanthocyanidin constituents are potent inhibitors and reducers of both brain plaques and tangles. *Scientific reports*. 2019;9(1):561.
153. de Paula LC, Fonseca F, Perazzo F, Cruz FM, Cubero D, Trufelli DC, et al. *Uncaria tomentosa* (cat's claw) improves quality of life in patients with advanced solid tumors. *J Altern Complement Med*. 2015;21(1):22-30.
154. Sheng Y, Li L, Holmgren K, Pero RW. DNA repair enhancement of aqueous extracts of *Uncaria tomentosa* in a human volunteer study. *Phytomedicine*. 2001;8(4):275-82.
155. Mur E, Hartig F, Eibl G, Schirmer M. Randomized double blind trial of an extract from the pentacyclic alkaloid-chemotype of *uncaria tomentosa* for the treatment of rheumatoid arthritis. *J Rheumatol*. 2002;29(4):678-81.
156. Piscoya J, Rodriguez Z, Bustamante SA, Okuhama NN, Miller MJ, Sandoval M. Efficacy and safety of freeze-dried cat's claw in osteoarthritis of the knee: mechanisms of action of the species *Uncaria guianensis*. *Inflamm Res*. 2001;50(9):442-8.
157. Datar AN, Kaur N, Patel S, Luecke DF, Sapi E. In Vitro Effectiveness of Samento and Banderol Herbal Extracts on Different Morphological Forms of *Borrelia burgdorferi*: University of New Haven; 2010.

158. Herrera DR, Durand-Ramirez JE, Falcao A, Silva EJ, Santos EB, Gomes BP. Antimicrobial activity and substantivity of *Uncaria tomentosa* in infected root canal dentin. *Braz Oral Res.* 2016;30(1):e61.
159. Herrera DR, Tay LY, Rezende EC, Kozlowski VA, Jr., Santos EB. In vitro antimicrobial activity of phytotherapeutic *Uncaria tomentosa* against endodontic pathogens. *J Oral Sci.* 2010;52(3):473-6.
160. Hilepo JN, Bellucci AG, Mossey RT. Acute renal failure caused by 'cat's claw' herbal remedy in a patient with systemic lupus erythematosus. *Nephron.* 1997;77(3):361.
161. Keplinger K, Laus G, Wurm M, Dierich MP, Teppner H. *Uncaria tomentosa* (Willd.) DC.— Ethnomedicinal use and new pharmacological, toxicological and botanical results. *Journal of Ethnopharmacology.* 1998;64(1):23-34.
162. Chinou I, Demetzos C, Harvala C, Roussakis C, Verbist JF. Cytotoxic and antibacterial labdane-type diterpenes from the aerial parts of *Cistus incanus* subsp. *creticus*. *Planta Med.* 1994;60(1):34-6.
163. Kalus U, Grigorov A, Kadecki O, Jansen JP, Kiesewetter H, Radtke H. *Cistus incanus* (CYSTUS052) for treating patients with infection of the upper respiratory tract. A prospective, randomised, placebo-controlled clinical study. *Antiviral Res.* 2009;84(3):267-71.
164. Kalus U, Kiesewetter H, Radtke H. Effect of CYSTUS052 and green tea on subjective symptoms in patients with infection of the upper respiratory tract. *Phytotherapy research : PTR.* 2010;24(1):96-100.
165. Hutschenreuther A, Birkemeyer C, Grotzinger K, Straubinger RK, Rauwald HW. Growth inhibiting activity of volatile oil from *Cistus creticus* L. against *Borrelia burgdorferi* s.s. in vitro. *Die Pharmazie.* 2010;65(4):290-5.
166. Hickl J, Argyropoulou A, Sakavitsi ME, Halabalaki M, Al-Ahmad A, Hellwig E, et al. Mediterranean herb extracts inhibit microbial growth of representative oral microorganisms and biofilm formation of *Streptococcus mutans*. *PLoS One.* 2018;13(12):e0207574.
167. Hannig C, Sorg J, Spitzmuller B, Hannig M, Al-Ahmad A. Polyphenolic beverages reduce initial bacterial adherence to enamel in situ. *J Dent.* 2009;37(7):560-6.
168. Papaefthimiou D, Papanikolaou A, Falara V, Givanoudi S, Kostas S, Kanellis AK. Genus *Cistus*: a model for exploring labdane-type diterpenes' biosynthesis and a natural source of high value products with biological, aromatic, and pharmacological properties. *Front Chem.* 2014;2:35.
169. Ehrhardt C, Hrinčius ER, Korte V, Mazur I, Droebner K, Poetter A, et al. A polyphenol rich plant extract, CYSTUS052, exerts anti influenza virus activity in cell culture without toxic side effects or the tendency to induce viral resistance. *Antiviral Research.* 2007;76(1):38-47.
170. Brorson O, Brorson SH. Grapefruit seed extract is a powerful in vitro agent against motile and cystic forms of *Borrelia burgdorferi* sensu lato. *Infection.* 2007;35(3):206-8.
171. von Woedtke T, Schluter B, Pfliegel P, Lindequist U, Julich WD. Aspects of the antimicrobial efficacy of grapefruit seed extract and its relation to preservative substances contained. *Die Pharmazie.* 1999;54(6):452-6.
172. Sakamoto S, Sato K, Maitani T, Yamada T. [Analysis of components in natural food additive "grapefruit seed extract" by HPLC and LC/MS]. *Eisei Shikenjo Hokoku.* 1996(114):38-42.
173. Avula B, Dentali S, Khan IA. Simultaneous identification and quantification by liquid chromatography of benzethonium chloride, methyl paraben and triclosan in commercial products labeled as grapefruit seed extract. *Die Pharmazie.* 2007;62(8):593-6.
174. Takeoka G, Dao L, Wong RY, Lundin R, Mahoney N. Identification of benzethonium chloride in commercial grapefruit seed extracts. *J Agric Food Chem.* 2001;49(7):3316-20.
175. Brandin H, Myrberg O, Rundlof T, Arvidsson AK, Brenning G. Adverse effects by artificial grapefruit seed extract products in patients on warfarin therapy. *Eur J Clin Pharmacol.* 2007;63(6):565-70.
